# Supplementary material for: Chemometrics-assisted mechanism study of the room-temperature phosphorescence on nanoscopic boronate assemblies
Source: Royal Society of Chemistry journal article supplement (doi:10.1039/d2cc07049a), 2023-01-01
Supplement: d2cc07049a1.pdf [file d2cc07049a1.pdf]

## Electronic supporting Information

### Chemometrics-assisted mechanism study of the room-temperature phosphorescence on nanoscopic boronate assemblies

Kaede Kawaguchi, Masato Ito and Yuji Kubo\*

*Department of Applied Chemistry, Graduate School of Urban Environmental Sciences, Tokyo Metropolitan  
University, 1-1 Minami-Osawa, Hachioji, Tokyo 192-0397, Japan*

#### Contents

|                                                                                                                                          |     |
|------------------------------------------------------------------------------------------------------------------------------------------|-----|
| 1. General .....                                                                                                                         | S2  |
| 2. Materials.....                                                                                                                        | S2  |
| 3. Synthesis and preparations .....                                                                                                      | S2  |
| 4. Measurement of BDBA/PE ratio and estimation of the degree of polymerizations ( $X_n$ ) .....                                          | S2  |
| 5. X-ray photoelectron spectroscopy (XPS) measurements .....                                                                             | S3  |
| 6. Temperature dependent delayed emission spectra .....                                                                                  | S3  |
| 7. Diffusion reflection absorption spectra of boronate assemblies.....                                                                   | S3  |
| 8. Steady-state emission spectra of boronate assemblies .....                                                                            | S4  |
| 9. Chemometrics analysis.....                                                                                                            | S4  |
| 10. Contribution coefficients.....                                                                                                       | S5  |
| 11. Relationship between the RTP intensity and peak 2 parameters.....                                                                    | S5  |
| 12. Crystal structure simulation of boronate assemblies by compound 1 .....                                                              | S6  |
| 13. DFT calculations .....                                                                                                               | S6  |
| 14. Fluorescence decay profiles of boronate assemblies.....                                                                              | S6  |
| 15. Absorption spectrum of BDBA crystal .....                                                                                            | S7  |
| 16. Errors of the predicted RTP intensities of unknown samples .....                                                                     | S7  |
| 17. Preparation conditions of boronate assemblies .....                                                                                  | S9  |
| 18. Entire dataset for chemometrics analyses before auto-scaling.....                                                                    | S10 |
| 19. Emission intensities of each boronate assembly (Response variables for PCR).....                                                     | S13 |
| 20. Score of PCA .....                                                                                                                   | S13 |
| 21. Loadings of PCA.....                                                                                                                 | S14 |
| 22. Contribution ratios of each principal component .....                                                                                | S15 |
| 23. Standardized correlation coefficients of PCR .....                                                                                   | S15 |
| 24. Contributions of each parameter (Inner product of the PCA loading vector and the standardized correlation coefficients of PCR) ..... | S16 |
| 25. Cartesian coordinates of the dimer models .....                                                                                      | S17 |

## 1. General

The absorption and emission were measured using Shimadzu UV-3600 UV/vis/NIR spectrometer and JASCO FP-8500 spectrofluorometers, respectively. Quantum yields were measured with an integrating sphere unit (JASCO ILF-835 60 mm  $\phi$ ) on FP-8500. Fluorescence lifetimes were measured using Hamamatsu Photonics Quantaarus-Tau C11367 and TDC unit M12977-01. Powder X-ray diffraction (PXRD) data were collected by a Rigaku RINT-TTR III X-ray diffractometer with Cu K $\alpha$  radiation. Field-emission scanning electron microscopy (FE-SEM) was performed using a JEOL JSM-7500F (acceleration voltage of 5 kV). The sample was coated with Os on a Meiwafoxis Neoc-Pro osmium coater. Transmission electron microscopy (TEM) was performed using a JEOL JEM-3200FS (acceleration voltage 300 kV). Fourier-transform infrared (FT-IR) spectroscopy was performed using a JASCO FT/IR-4600 type A with ATR PRO 450-S. Photographic images were taken with a digital camera (Canon EOS Kiss X8i). X-ray photoelectron spectra was measured with a JEOL JPS9010MX.

## 2. Materials

Unless otherwise indicated, reagents used for the synthesis were commercially available and were used as supplied.

## 3. Synthesis and preparations

### Preparation of BFs

To a MeOH solution (50 mL) of PE (20 mM) was added MeOH/H<sub>2</sub>O=4/1 v/v solution (50 mL) of BDBA dropwise over 4 h while stirring. The resultant white solid was collected by filtration, washed with MeOH and dried in vacuo.

### Preparation of BSs

To a THF dispersion (50 mL) of ball milled PE (20 mM) was added THF solution (50 mL) of BDBA in one portion. The resultant dispersed solution was allowed to stand for 24 h at room-temperature under dark condition. The white precipitate was collected by filtration, washed with MeOH and dried in ambient condition over 2 days.

### Synthesis of 3,9-diphenyl-2,4,8,10-tetraoxa-3,9-diboraspino[5.5] undecane (1)

It was synthesized according to the methods previously reported<sup>1</sup>. <sup>1</sup>H NMR (500 MHz, CDCl<sub>3</sub>):  $\delta$  (ppm) 7.79 (dd,  $J=8.03$  and  $1.33$  Hz, 4H), 7.45 (tt,  $J=7.41$  and  $1.68$  Hz, 2H), 7.35-7.38 (m, 4H), 4.07 (s, 8H). <sup>13</sup>C NMR (126 MHz, CDCl<sub>3</sub>):  $\delta$  (ppm) 133.94, 131.12, 127.67, 64.93, 36.67. <sup>11</sup>B NMR (128 MHz, CDCl<sub>3</sub>):  $\delta$  (ppm) 25.28. FAB-MS (positive mode):  $m/z=308$  [M]<sup>+</sup>.

## 4. Measurement of BDBA/PE ratio and estimation of the degree of polymerizations ( $X_n$ )

Boronate assembly was decomposed and dissolved into 1 M NaOH solution (MeOH/H<sub>2</sub>O = 1:1 v/v). The concentration of BDBA was then measured by UV/Vis. Herein, a calibration curve of BDBA was obtained in identical solvent condition. Note that, all of the experiments were conducted in glovebox to avoid the oxidation of boronate salts. The ratio of BDBA/PE was calculated from the concentration of BDBA and the dissolved weight of boronate assemblies. Degree of polymerization ( $X_n$ ) was calculated by the equation below, assuming that both sides of polymer chain are capped with PE (Fig. S1); the structure was estimated from the ATR-FTIR (Fig. 2b) and XPS (Fig. S2).

$$\frac{m_{\text{BDBA}}}{m_{\text{PE}}} = \frac{161.714 \cdot X_n}{68.013 \cdot (X_n - 1) + 204.136} \quad (\text{Eq. S1})$$

Where  $m_{\text{BDBA}}$  and  $m_{\text{PE}}$  are the weights of BDBA and PE in an assembly, respectively.

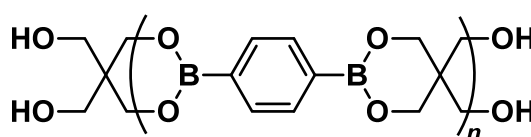

**Fig. S1.** Plausible structure of the polymer chain in the boronate assemblies, estimated from the FTIR spectra.

## 5. X-ray photoelectron spectroscopy (XPS) measurements

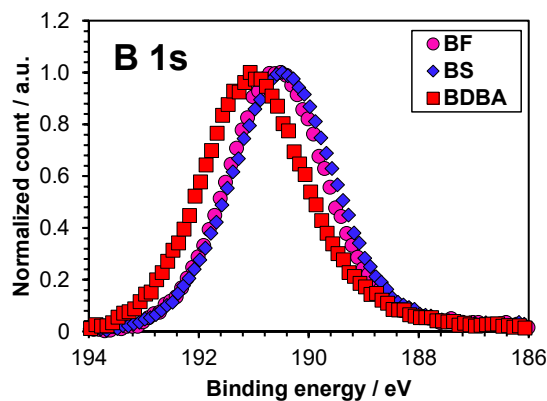

Fig. S2. XPS spectra of B 1s bands of BF, BS and BDBA.

## 6. Temperature dependent delayed emission spectra

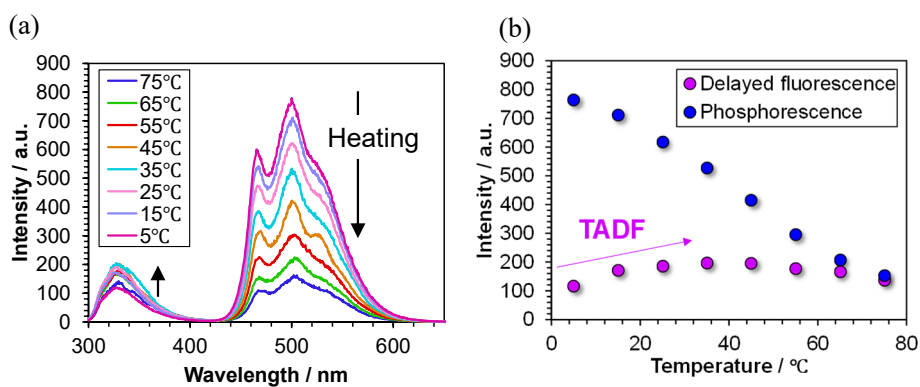

Fig. S3. Temperature dependent delayed emission spectra and (b) the temperature dependence of RTP and TADF intensity of BF. ( $\lambda_{\text{ex}} = 254$  nm, delay time: 50 ms, MeOH dispersion)

## 7. Diffusion reflection absorption spectra of boronate assemblies

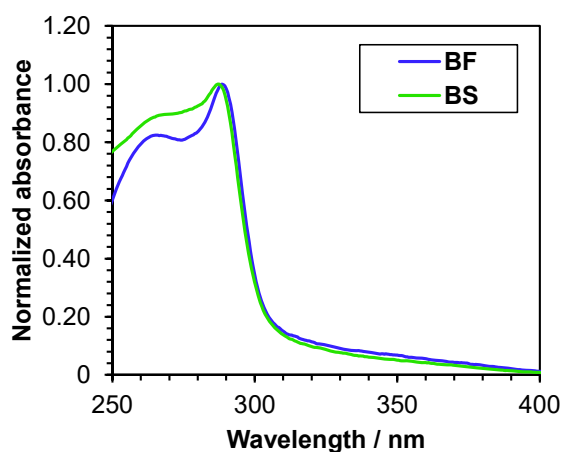

Fig. S4. Diffusion reflection absorption spectra of boronate assemblies.

## 8. Steady-state emission spectra of boronate assemblies

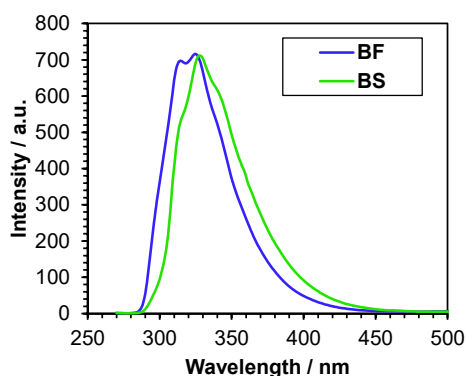

Fig. S5. Steady-state emission spectra of boronate assemblies. ( $\lambda_{\text{ex}} = 254 \text{ nm}$ , MeOH dispersion)

## 9. Chemometrics analysis

All the chemometrics analyses in this work were performed using Python 3.7.9<sup>2</sup>, Pandas<sup>3</sup>, Numpy<sup>4</sup>, Scikit-learn<sup>5,6</sup>, Matplotlib<sup>7</sup>, and Scipy<sup>8</sup>. The dataset for the chemometrics QSPR analyses was prepared from the PXRD patterns of boronate assemblies. The PXRD patterns consisted of a maximum of 23 diffractions to be deconvoluted by 23 pseudo-Voigt functions. Peak amplification, peak width, and peak positions were extracted from the fitting result. Then the two-dimensional dataset was constructed from those parameters. The procedure so far is schematically illustrated in Fig. S4. Some missing data in the 2D-dataset was interpolated by MissForest in which the non-parametric missing value imputation method based on random forest<sup>9</sup>. The interpolated 2D-dataset was then auto-scaled and used for further chemometrics analyses. The RTP intensities at 500 nm at 50 ms of delay were used for the visualizations of chemometrics analyses. The additional two samples were prepared as out-of-sample prediction dataset, to evaluate the performance of PCR; whose PXRD patterns were analyzed by same procedure.

PCA of the 2D-dataset was performed by 7 principal components, and all of the components were used for PCR by using the RTP intensities at 500 nm at 50 ms of delay as response variables. To analyze the contributions of each peak parameter, inner product of the PCA loading vectors and the standardize regression coefficients were calculated. *t*-SNE analysis were performed with 5 of perplexity and 2 of components (meaning of 2 dimension).

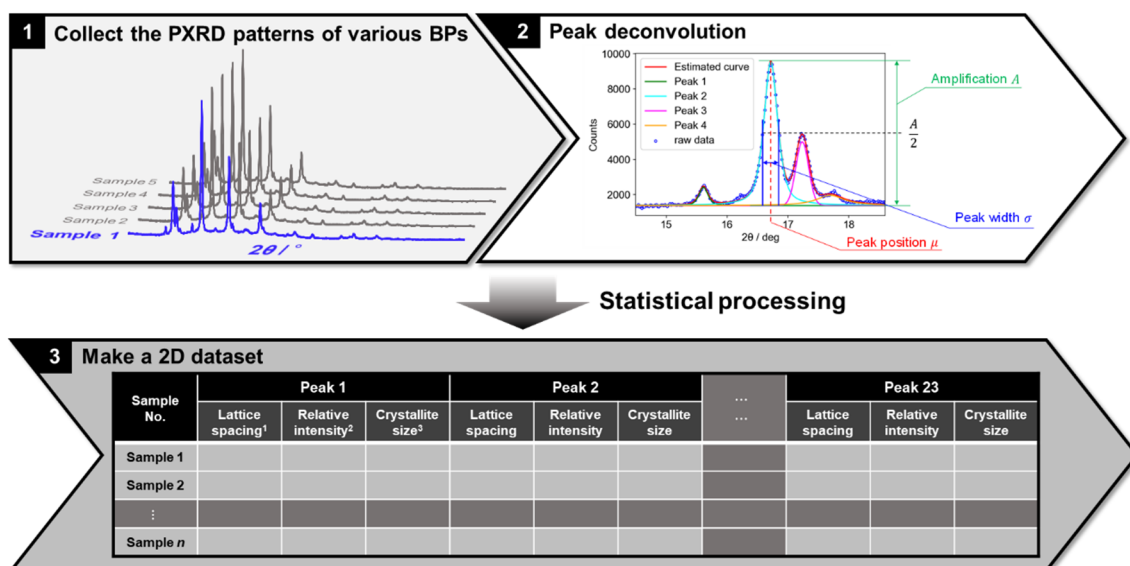

<sup>1</sup>Calculated from the peak position by Bragg's law. <sup>2</sup>Relative intensity to the largest peak. <sup>3</sup>Calculated from the peak width by Scherrer equation.

Fig. S6. Schematic drawing of the chemometrics analysis procedure.

## 10. Contribution coefficients

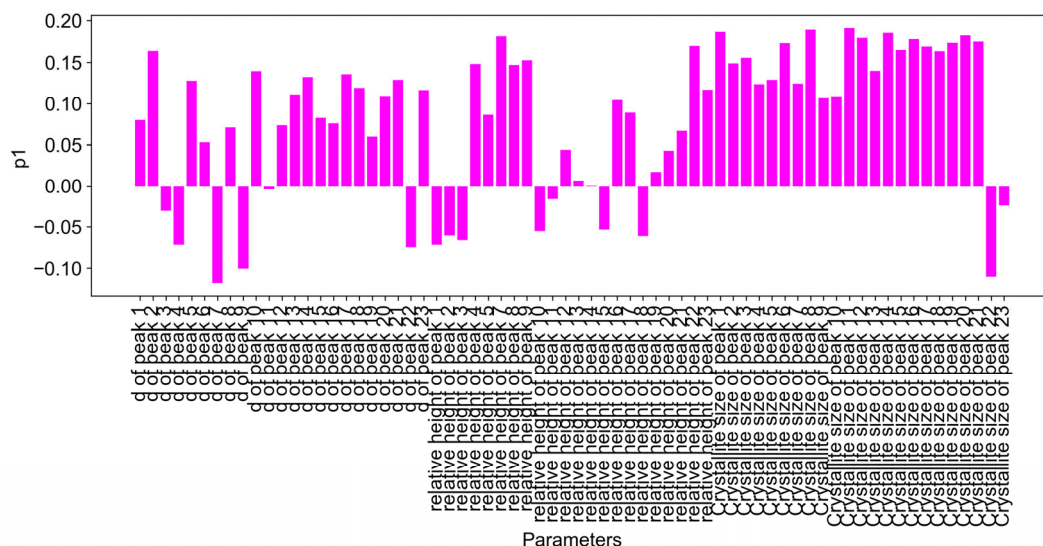

Fig. S7. Loading vectors (contributions) of each parameter in 1<sup>st</sup> principal component of PCA.

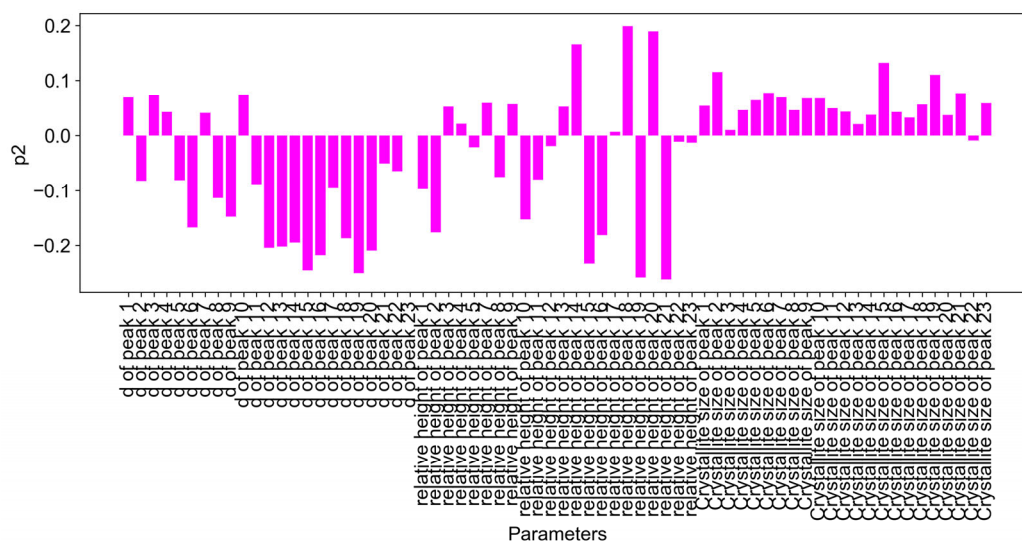

Fig. S8. Loading vectors (contributions) of each parameter in 2<sup>nd</sup> principal component of PCA.

## 11. Relationship between the RTP intensity and peak 2 parameters

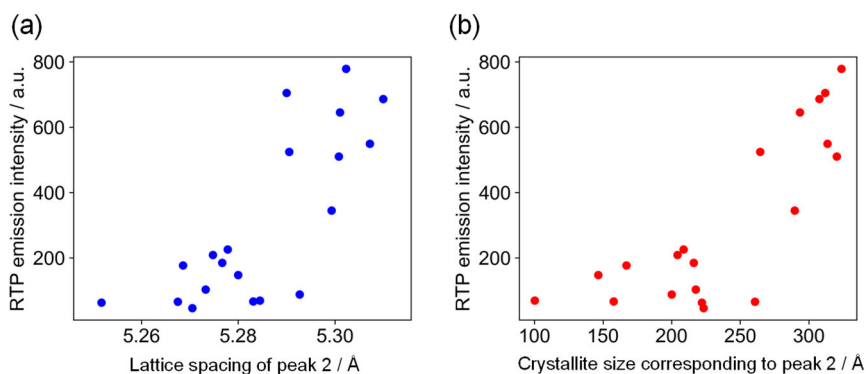

Fig. S9. Relationship between RTP intensity and the lattice spacing of peak 2 or crystallite size corresponding to peak 2.

## 12. Crystal structure simulation of boronate assemblies by compound **1**

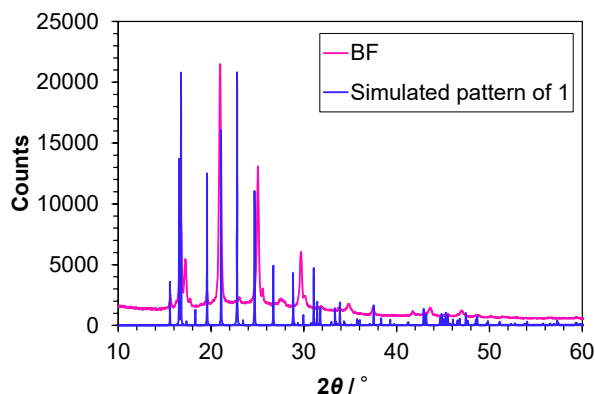

**Fig. S10.** PXRD pattern of **BF** compared to the simulated PXRD pattern of model compound **1**.

## 13. DFT calculations

Density functional theory (DFT) calculations were performed in Orca 4.2.1 software<sup>10, 11</sup>. The structure of dimer model was extracted from the single crystal of compound **1** (CCDC No. 1968918). Only the positions of hydrogens were optimized at B3LYP-D3BJ/def2-TZVP level. Distance between the molecules in a dimer was modified along the normal vector of (011) lattice plane. TD-DFT calculation was performed for the dimer models at  $\omega$ B97X-D3/def2-TZVP level with RI and COSX approximation. The contribution of CT transition was extracted from the configuration interaction (CI) coefficients in  $S_1$  state. The molecular orbitals were visualized using Avogadro 1.2.0 program<sup>12, 13</sup>.

## 14. Fluorescence decay profiles of boronate assemblies

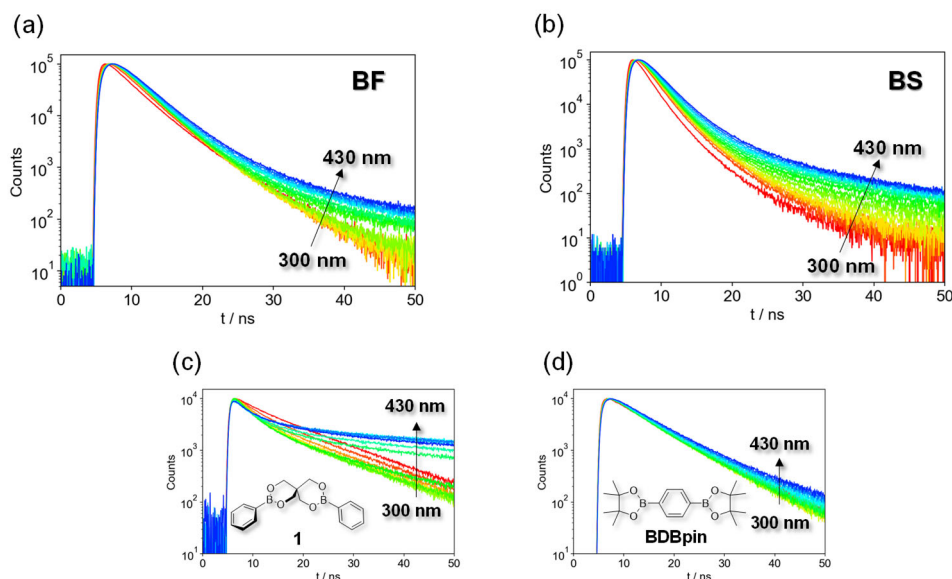

**Fig. S11.** Emission wavelength dependent fluorescence decay profiles of boronate assemblies, model compound **1**, and benzene-1,4-diboronic acid bis(pinacol) ester (BDBpin). ( $\lambda_{\text{ex}} = 280$  nm, room-temperature, solid-state)

**Table S1.** Deconvoluted fluorescence decay parameters at  $\lambda_{em} = 400$  nm.

| Emission<br>wavelength / nm | BF       |          |          |          | BS       |          |          |          |
|-----------------------------|----------|----------|----------|----------|----------|----------|----------|----------|
|                             | $\tau_1$ | $\tau_2$ | $A_1$    | $A_2$    | $\tau_1$ | $\tau_2$ | $A_1$    | $A_2$    |
| 300                         | 3.418917 | 7.58518  | 107525.6 | 5834.057 | 1.988512 | 6.730099 | 118358   | 1488.089 |
| 310                         | 3.660027 | 13.12051 | 115907.8 | 672.0315 | 2.197124 | 7.207001 | 115203.6 | 1529.175 |
| 320                         | 3.670594 | 17.60218 | 116681.9 | 299.1434 | 2.287124 | 8.557602 | 122184.3 | 1163.441 |
| 330                         | 3.646579 | 16.62814 | 116793.5 | 281.6032 | 2.341464 | 9.460951 | 125264.1 | 1058.839 |
| 340                         | 3.642737 | 21.21848 | 117591   | 269.7206 | 2.304106 | 8.909403 | 119588.3 | 1474.123 |
| 350                         | 3.594707 | 17.13545 | 113411.9 | 516.3218 | 2.359804 | 10.78619 | 122419.9 | 1252.566 |
| 360                         | 3.627367 | 20.69567 | 116386.5 | 499.4754 | 2.376785 | 11.47014 | 119182.5 | 1358.593 |
| 370                         | 3.607194 | 18.98669 | 114839.1 | 768.5688 | 2.399879 | 12.35389 | 117861.5 | 1465.718 |
| 380                         | 3.661949 | 21.03801 | 117328   | 781.8108 | 2.46237  | 13.54887 | 118803.9 | 1477.218 |
| 390                         | 3.689806 | 19.81537 | 115848.2 | 978.8943 | 2.512634 | 13.96027 | 118954.6 | 1611.719 |
| 400                         | 3.717663 | 19.75016 | 112904.6 | 1113.634 | 2.584634 | 14.54171 | 118632.7 | 1673.525 |
| 410                         | 3.831974 | 21.93461 | 116002.7 | 993.1673 | 2.664785 | 14.68027 | 119323   | 1738.969 |
| 420                         | 3.882886 | 21.61673 | 114932.8 | 1123.328 | 2.697389 | 13.92767 | 115573.5 | 2063.899 |
| 430                         | 4.021212 | 24.72225 | 117967.2 | 946.6471 | 2.814898 | 14.51686 | 118184.4 | 2028.438 |

## 15. Absorption spectrum of BDBA crystal

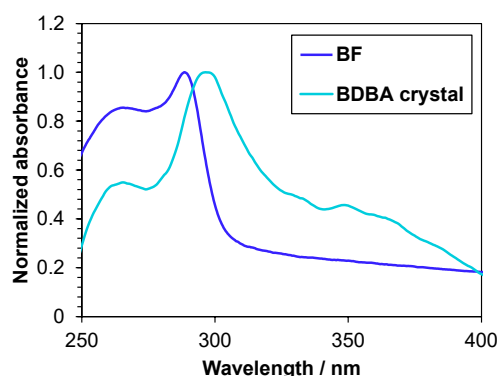**Fig. S12.** Diffusion reflection absorption spectra of **BF** and **BDBA** crystal.

## 16. Errors of the predicted RTP intensities of unknown samples

**Table S2.** Errors of the predicted RTP intensities of out-of-sample unknown samples.

|                             | Actual intensity / a.u. | Estimated intensity / a.u. | Error / a.u. |
|-----------------------------|-------------------------|----------------------------|--------------|
| <b>Sample 1 (Class: BF)</b> | 705.165                 | 691.325                    | -13.840      |
| <b>Sample 2 (Class: BS)</b> | 148.321                 | 136.634                    | -11.687      |

## References

1. M. Hoshi, R. Nishiyabu, Y. Hayashi, S. Yagi and Y. Kubo, *Chem. Asian J.*, 2020, **15**, 787-795.
2. G. Van Rossum and F. L. Drake, *Python 3 Reference Manual*, CreateSpace.
3. T. team, *pandas-dev/pandas: Pandas*, Zenodo.
4. C. R. Harris, K. J. Millman, S. J. Walt, R. Gommers, P. Virtanen, D. Cournapeau, E. Wieser, J. Taylor, S. Berg, N. J. Smith, R. Kern, M. Picus, S. Hoyer, M. H. Kerkwijk, M. Brett, A. Haldane, J. F. Río, M. Wiebe, P. Peterson, P. Gérard-Marchant, K. Sheppard, T. Reddy, W. Weckesser, H. Abbasi, C. Gohlke and T. E. Oliphant, *Nature*, **585**, 357-362.

5. F. Pedregosa, G. Varoquaux, A. Gramfort, V. Michel, B. Thirion, O. Grisel, M. Blondel, P. Prettenhofer, R. Weiss, V. Dubourg, J. Vanderplas, A. Passos, D. Cournapeau, M. Brucher, M. Perrot and E. Duchesnay, *J. Mach. Learn. Res.*, **12**, 2825-2830.
6. L. Buitinck, G. Louppe, M. Blondel, F. Pedregosa, A. Mueller, O. Grisel, V. Niculae, P. Prettenhofer, A. Gramfort, J. Grobler, R. Layton, J. VanderPlas, A. Joly, B. Holt and G. Varoquaux, ECML PKDD Workshop: Languages for Data Mining and Machine Learning.
7. J. D. Hunter, *Comput. Sci. Eng.*, **9**, 90-95.
8. P. Virtanen, R. Gommers, T. E. Oliphant, M. Haberland, T. Reddy, D. Cournapeau, E. Burovski, P. Peterson, W. Weckesser, J. Bright, S. J. van der Walt, M. Brett, J. Wilson, K. J. Millman, N. Mayorov, A. R. J. Nelson, E. Jones, R. Kern, E. Larson, C. J. Carey, Í. Polat, Y. Feng, E. W. Moore, J. VanderPlas, D. Laxalde, J. Perktold, R. Cimrman, I. Henriksen, E. A. Quintero, C. R. Harris, A. M. Archibald, A. H. Ribeiro, F. Pedregosa, P. van Mulbregt and C. SciPy, *Nat. Methods*, **17**, 261-272.
9. D. J. Stekhoven and P. Bühlmann, *Bioinformatics*, 2011, **28**, 112-118.
10. F. Neese, *Wiley Interdiscip. Rev. Comput. Mol. Sci.*, 2012, **2**, 73-78.
11. F. Neese, *Wiley Interdiscip. Rev. Comput. Mol. Sci.*, 2018, **8**, e1327.
12. M. D. Hanwell, D. E. Curtis, D. C. Lonie, T. Vandermeersch, E. Zurek and G. R. Hutchison, *J. Cheminformatics*, 2012, **4**, 17.
13. Avogadro: an open-source molecular builder and visualization tool. Version 1.2.0. <http://avogadro.cc/>



## 17. Preparation conditions of boronate assemblies

**Table S3.** Preparation conditions of boronate assemblies.

| Sample                    | Solvent                                      | PE         | Addition of <b>BDDBA</b> solution | Note                                                           |
|---------------------------|----------------------------------------------|------------|-----------------------------------|----------------------------------------------------------------|
| Sample 1                  | MeOH/H <sub>2</sub> O = 9/1 (V/V)            | Commercial | 20 mM in 50 mL<br>Dropwise        | Stirred 4 h                                                    |
| Sample 2                  | MeOH/H <sub>2</sub> O = 9/1 (V/V)            | Commercial | 20 mM in 50 mL<br>Rapidly         | Stand for overnight                                            |
| Sample 3                  | MeOH/H <sub>2</sub> O/THF=85/10/5<br>(V/V/V) | Commercial | 20 mM in 50 mL<br>Rapidly         | Stand for overnight                                            |
| Sample 4                  | THF                                          | Ground     | 20 mM in 50 mL<br>Rapidly         | Stand for overnight                                            |
| Sample 5                  | THF                                          | Ground     | 20 mM in 50 mL<br>Rapidly         | Stand for overnight                                            |
| Sample 6                  | DMSO                                         | Ground     | 20 mM in 50 mL<br>Rapidly         | Stand for overnight                                            |
| Sample 7                  | 1,4-dioxane                                  | Ground     | 20 mM in 50 mL<br>Rapidly         | Stand for overnight                                            |
| Sample 8                  | Acetonitrile                                 | Ground     | 20 mM in 50 mL<br>Rapidly         | Stand for overnight                                            |
| Sample 9                  | Ethyl acetate                                | Ground     | 20 mM in 50 mL<br>Rapidly         | Stand for overnight                                            |
| Sample 10                 | Acetone                                      | Ground     | 20 mM in 50 mL<br>Rapidly         | Stand for overnight                                            |
| Sample 11                 | MeOH                                         | Comercial  | 20 mM in 50 mL<br>Dropwise        | Stirred 2 days                                                 |
| Sample 12                 | MeOH                                         | Comercial  | 20 mM in 50 mL<br>Rapidly         | Stirred overnight                                              |
| Sample 13                 | MeOH/H <sub>2</sub> O = 99/1 (V/V)           | Comercial  | 100 mM in 10 mL<br>Rapidly        | Stand for overnight                                            |
| Sample 14                 | MeOH/H <sub>2</sub> O = 99/1 (V/V)           | Comercial  | 20 mM in 50 mL<br>Rapidly         | Stand for overnight                                            |
| Sample 15                 | MeOH/H <sub>2</sub> O = 99/1 (V/V)           | Comercial  | 20 mM in 50 mL<br>Rapidly         | Stand for overnight<br>and calcined at<br>300°C under nitrogen |
| Sample 16                 | MeOH/H <sub>2</sub> O = 9/1 (V/V)            | Comercial  | 20 mM in 50 mL<br>Dropwise        | Stirred 4 h                                                    |
| Sample 17                 | MeOH/H <sub>2</sub> O = 9/1 (V/V)            | Comercial  | 20 mM in 50 mL<br>Dropwise        | Stirred 4 h                                                    |
| Sample 18                 | MeOH/H <sub>2</sub> O = 9/1 (V/V)            | Comercial  | 20 mM in 50 mL<br>Dropwise        | Stirred 4 h                                                    |
| <b>Out-of-sample data</b> |                                              |            |                                   |                                                                |
| Sample 19                 | MeOH/H <sub>2</sub> O = 9/1 (V/V)            | Comercial  | 20 mM in 50 mL<br>Dropwise        | Stirred 4 h                                                    |
| Sample 20                 | MeOH                                         | Comercial  | 20 mM in 50 mL<br>Rapidly         | Stand for overnight                                            |

## 18. Entire dataset for chemometrics analyses before auto-scaling

**Table S4.** Input dataset for chemometrics analyses before auto-scaling (lattice spacing  $d$ ).

| Peak no.  | Lattice spacings $d$ |       |       |       |       |       |       |       |       |       |       |       |       |       |       |       |       |       |       |       |       |       |       |
|-----------|----------------------|-------|-------|-------|-------|-------|-------|-------|-------|-------|-------|-------|-------|-------|-------|-------|-------|-------|-------|-------|-------|-------|-------|
|           | 1                    | 2     | 3     | 4     | 5     | 6     | 7     | 8     | 9     | 10    | 11    | 12    | 13    | 14    | 15    | 16    | 17    | 18    | 19    | 20    | 21    | 22    | 23    |
| Sample 1  | 5.672                | 5.302 | 5.145 | 5.005 | 4.537 | 4.236 | 3.865 | 3.555 | 3.483 | 3.235 | 3.008 | 2.963 | 2.807 | 2.656 | 2.580 | 2.401 | 2.165 | 2.137 | 2.075 | 1.995 | 1.933 | 1.873 | 1.816 |
| Sample 2  | 5.664                | 5.301 | 5.144 | 5.017 | 4.520 | 4.234 | 3.865 | 3.558 | 3.486 | 3.217 | 3.011 | 2.966 | 2.804 | 2.648 | 2.573 | 2.400 | 2.163 | 2.132 | 2.074 | 1.998 | 1.935 | 1.874 | 1.818 |
| Sample 3  | 5.667                | 5.299 | 5.142 | 5.013 | 4.475 | 4.234 | 3.873 | 3.557 | 3.486 | 3.214 | 3.012 | 2.965 | 2.804 | 2.645 | 2.569 | 2.401 | 2.156 | 2.116 | 2.069 | 1.994 | 1.932 | 1.875 | 1.818 |
| Sample 4  | 5.654                | 5.268 | 5.166 | 5.008 | 4.442 | 4.230 | 3.870 | 3.556 | 3.486 | 3.208 | 3.008 | 2.926 | 2.728 | 2.580 | 2.392 | 2.315 | 2.156 | 2.072 | 2.058 | 1.929 | 1.928 | 1.875 | 1.814 |
| Sample 5  | 5.630                | 5.252 | 5.151 | 5.008 | 4.435 | 4.221 | 3.870 | 3.546 | 3.486 | 3.195 | 3.006 | 2.795 | 2.628 | 2.556 | 2.397 | 2.156 | 2.156 | 2.079 | 1.987 | 1.925 | 1.927 | 1.875 | 1.814 |
| Sample 6  | 5.589                | 5.284 | 5.140 | 5.007 | 4.492 | 4.263 | 3.868 | 3.561 | 3.487 | 3.189 | 3.012 | 2.962 | 2.784 | 2.644 | 2.598 | 2.398 | 2.160 | 2.127 | 2.088 | 1.987 | 1.927 | 1.875 | 1.815 |
| Sample 7  | 5.660                | 5.271 | 5.187 | 5.007 | 4.449 | 4.231 | 3.869 | 3.554 | 3.486 | 3.194 | 3.014 | 2.956 | 2.757 | 2.616 | 2.580 | 2.390 | 2.157 | 2.103 | 2.079 | 1.972 | 1.927 | 1.874 | 1.814 |
| Sample 8  | 5.674                | 5.269 | 5.146 | 5.003 | 4.548 | 4.241 | 3.866 | 3.566 | 3.488 | 3.211 | 3.011 | 2.971 | 2.818 | 2.655 | 2.599 | 2.407 | 2.164 | 2.149 | 2.083 | 1.993 | 1.932 | 1.872 | 1.817 |
| Sample 9  | 5.646                | 5.277 | 5.164 | 5.008 | 4.374 | 4.219 | 3.869 | 3.544 | 3.486 | 3.206 | 3.000 | 2.914 | 2.796 | 2.618 | 2.579 | 2.397 | 2.156 | 2.102 | 2.076 | 1.993 | 1.927 | 1.874 | 1.814 |
| Sample 10 | 5.673                | 5.273 | 5.198 | 5.004 | 4.551 | 4.240 | 3.867 | 3.550 | 3.486 | 3.204 | 3.007 | 2.959 | 2.786 | 2.639 | 2.587 | 2.399 | 2.160 | 2.148 | 2.079 | 1.978 | 1.932 | 1.873 | 1.816 |
| Sample 11 | 5.665                | 5.293 | 5.131 | 5.011 | 4.446 | 4.215 | 3.870 | 3.539 | 3.486 | 3.219 | 2.993 | 2.935 | 2.804 | 2.644 | 2.558 | 2.398 | 2.154 | 2.109 | 2.069 | 1.991 | 1.924 | 1.875 | 1.811 |
| Sample 12 | 5.658                | 5.291 | 5.130 | 5.005 | 4.514 | 4.253 | 3.867 | 3.570 | 3.487 | 3.200 | 3.027 | 2.963 | 2.791 | 2.652 | 2.581 | 2.400 | 2.165 | 2.132 | 2.085 | 1.994 | 1.941 | 1.881 | 1.814 |
| Sample 13 | 5.475                | 5.275 | 5.129 | 5.008 | 4.456 | 4.230 | 3.870 | 3.555 | 3.487 | 3.207 | 3.010 | 2.967 | 2.795 | 2.641 | 2.563 | 2.394 | 2.157 | 2.107 | 2.083 | 1.985 | 1.929 | 1.875 | 1.814 |
| Sample 14 | 5.482                | 5.278 | 5.128 | 5.006 | 4.449 | 4.231 | 3.870 | 3.556 | 3.487 | 3.207 | 3.074 | 3.009 | 2.788 | 2.635 | 2.570 | 2.387 | 2.157 | 2.107 | 2.072 | 1.986 | 1.928 | 1.875 | 1.814 |
| Sample 15 | 5.675                | 5.283 | 5.132 | 5.008 | 4.455 | 4.222 | 3.869 | 3.546 | 3.487 | 3.197 | 2.996 | 2.938 | 2.798 | 2.641 | 2.565 | 2.406 | 2.157 | 2.112 | 2.083 | 1.987 | 1.929 | 1.874 | 1.814 |
| Sample 16 | 5.665                | 5.301 | 5.143 | 4.998 | 4.518 | 4.234 | 3.866 | 3.558 | 3.486 | 3.210 | 3.013 | 2.972 | 2.806 | 2.645 | 2.571 | 2.399 | 2.161 | 2.137 | 2.073 | 1.996 | 1.936 | 1.875 | 1.816 |
| Sample 17 | 5.670                | 5.307 | 5.146 | 5.003 | 4.524 | 4.243 | 3.866 | 3.564 | 3.487 | 3.217 | 3.017 | 2.969 | 2.809 | 2.646 | 2.571 | 2.403 | 2.163 | 2.141 | 2.081 | 1.996 | 1.936 | 1.879 | 1.820 |
| Sample 18 | 5.688                | 5.310 | 5.145 | 4.994 | 4.549 | 4.241 | 3.863 | 3.560 | 3.486 | 3.208 | 3.013 | 2.969 | 2.859 | 2.706 | 2.610 | 2.405 | 2.165 | 2.138 | 2.081 | 1.995 | 1.934 | 1.867 | 1.817 |

**Table S5.** Input dataset for chemometrics analyses before auto-scaling (Relative height).

| Peak no.  | Relative height |         |        |       |        |         |       |        |       |       |        |        |       |       |       |       |       |       |       |       |       |       |       |
|-----------|-----------------|---------|--------|-------|--------|---------|-------|--------|-------|-------|--------|--------|-------|-------|-------|-------|-------|-------|-------|-------|-------|-------|-------|
|           | 1               | 2       | 3      | 4     | 5      | 6       | 7     | 8      | 9     | 10    | 11     | 12     | 13    | 14    | 15    | 16    | 17    | 18    | 19    | 20    | 21    | 22    | 23    |
| Sample 1  | 5.051           | 40.425  | 19.541 | 2.748 | 6.848  | 100.000 | 2.242 | 61.253 | 5.825 | 2.281 | 2.281  | 3.982  | 1.200 | 1.434 | 3.506 | 2.831 | 2.014 | 0.542 | 3.371 | 0.841 | 2.336 | 0.517 | 0.589 |
| Sample 2  | 4.744           | 70.507  | 30.751 | 2.063 | 0.000  | 100.000 | 1.130 | 44.806 | 0.000 | 2.967 | 15.867 | 0.000  | 1.702 | 2.238 | 2.838 | 2.482 | 1.755 | 0.000 | 3.691 | 1.282 | 2.465 | 0.549 | 0.707 |
| Sample 3  | 4.398           | 68.067  | 29.945 | 2.052 | 0.000  | 100.000 | 1.160 | 43.986 | 0.000 | 3.080 | 14.817 | 0.000  | 1.494 | 2.082 | 2.604 | 2.297 | 1.103 | 0.000 | 2.611 | 1.077 | 2.002 | 0.485 | 0.589 |
| Sample 4  | 8.419           | 70.035  | 46.267 | 0.000 | 0.000  | 100.000 | 0.000 | 38.264 | 0.000 | 2.453 | 12.468 | 0.000  | 0.000 | 2.807 | 1.572 | 0.000 | 0.000 | 2.623 | 0.000 | 1.724 | 0.000 | 0.000 | 0.000 |
| Sample 5  | 7.814           | 53.349  | 39.921 | 0.000 | 0.000  | 100.000 | 0.000 | 40.293 | 0.000 | 3.238 | 13.126 | 1.373  | 3.140 | 3.470 | 2.031 | 1.398 | 0.000 | 3.934 | 0.785 | 2.442 | 0.000 | 0.000 | 0.000 |
| Sample 6  | 24.424          | 141.822 | 0.000  | 0.000 | 0.000  | 100.000 | 0.000 | 45.177 | 0.000 | 4.979 | 15.420 | 0.000  | 0.000 | 0.000 | 5.995 | 2.634 | 0.000 | 0.000 | 5.433 | 0.000 | 3.056 | 0.000 | 0.000 |
| Sample 7  | 11.299          | 74.695  | 61.921 | 0.000 | 0.000  | 100.000 | 0.000 | 40.990 | 0.000 | 3.292 | 13.353 | 0.000  | 0.000 | 0.000 | 4.272 | 1.996 | 0.000 | 0.000 | 3.970 | 0.000 | 1.993 | 0.000 | 0.000 |
| Sample 8  | 0.000           | 58.488  | 46.098 | 0.000 | 26.604 | 100.000 | 0.000 | 48.480 | 0.000 | 2.303 | 15.843 | 0.000  | 0.000 | 0.000 | 4.031 | 1.817 | 0.000 | 2.410 | 4.070 | 1.275 | 2.843 | 0.000 | 0.000 |
| Sample 9  | 6.759           | 44.556  | 39.719 | 0.000 | 10.797 | 100.000 | 0.000 | 39.582 | 0.000 | 2.959 | 13.878 | 0.000  | 1.035 | 0.000 | 3.150 | 2.010 | 1.366 | 0.000 | 3.577 | 0.938 | 2.199 | 0.000 | 0.000 |
| Sample 10 | 7.759           | 58.283  | 55.600 | 0.000 | 7.690  | 100.000 | 0.000 | 46.501 | 0.000 | 3.365 | 14.404 | 0.000  | 0.000 | 0.000 | 4.125 | 2.286 | 0.000 | 1.374 | 3.534 | 0.000 | 2.265 | 0.000 | 0.000 |
| Sample 11 | 5.705           | 58.985  | 20.928 | 0.000 | 0.000  | 100.000 | 0.000 | 45.850 | 0.000 | 4.832 | 18.168 | 0.000  | 3.193 | 2.080 | 4.126 | 2.383 | 1.350 | 0.000 | 3.486 | 1.014 | 2.193 | 0.000 | 0.376 |
| Sample 12 | 7.183           | 84.991  | 40.900 | 0.000 | 0.000  | 100.000 | 0.000 | 54.129 | 0.000 | 5.054 | 21.862 | 0.000  | 1.760 | 0.000 | 4.052 | 3.117 | 1.591 | 0.000 | 4.960 | 1.643 | 3.272 | 0.658 | 0.891 |
| Sample 13 | 10.254          | 75.081  | 36.728 | 0.000 | 0.000  | 100.000 | 0.000 | 46.801 | 0.000 | 5.088 | 17.092 | 0.000  | 3.151 | 2.895 | 4.208 | 2.149 | 1.274 | 0.000 | 3.337 | 0.000 | 2.005 | 0.000 | 0.000 |
| Sample 14 | 9.935           | 82.136  | 37.808 | 0.000 | 0.000  | 100.000 | 0.000 | 45.852 | 0.000 | 4.781 | 2.581  | 14.063 | 2.211 | 0.000 | 4.099 | 2.219 | 0.000 | 0.000 | 3.165 | 0.000 | 2.669 | 0.000 | 0.000 |
| Sample 15 | 5.257           | 78.069  | 38.904 | 0.000 | 0.000  | 100.000 | 0.000 | 47.082 | 0.000 | 6.287 | 17.183 | 0.000  | 2.968 | 4.082 | 4.303 | 2.931 | 0.000 | 0.000 | 3.727 | 0.000 | 2.359 | 0.000 | 0.000 |
| Sample 16 | 4.855           | 66.453  | 29.270 | 1.955 | 0.000  | 100.000 | 1.137 | 43.161 | 0.000 | 3.056 | 14.553 | 0.000  | 1.739 | 2.151 | 2.704 | 2.386 | 1.013 | 0.000 | 3.500 | 1.126 | 2.222 | 0.555 | 0.740 |
| Sample 17 | 5.081           | 74.917  | 32.679 | 0.000 | 0.000  | 100.000 | 1.015 | 44.890 | 0.000 | 3.129 | 14.974 | 0.000  | 1.498 | 2.225 | 2.603 | 2.348 | 0.000 | 0.914 | 2.501 | 0.890 | 1.767 | 0.437 | 0.527 |
| Sample 18 | 7.365           | 62.290  | 30.237 | 8.174 | 56.540 | 100.000 | 1.258 | 57.893 | 3.883 | 4.351 | 20.425 | 8.816  | 2.132 | 1.498 | 2.458 | 3.187 | 0.000 | 0.000 | 2.560 | 1.544 | 2.701 | 0.717 | 0.000 |

**Table S6.** Input dataset for chemometrics analyses before auto-scaling (Crystallite size).

| Peak no.  | Crystallite size |       |       |       |       |       |       |       |       |       |       |       |       |       |       |       |       |       |       |       |       |       |       |
|-----------|------------------|-------|-------|-------|-------|-------|-------|-------|-------|-------|-------|-------|-------|-------|-------|-------|-------|-------|-------|-------|-------|-------|-------|
|           | 1                | 2     | 3     | 4     | 5     | 6     | 7     | 8     | 9     | 10    | 11    | 12    | 13    | 14    | 15    | 16    | 17    | 18    | 19    | 20    | 21    | 22    | 23    |
| Sample 1  | 468.0            | 323.7 | 318.7 | 304.4 | 588.0 | 348.1 | 316.5 | 411.3 | 579.1 | 141.4 | 354.3 | 343.8 | 228.2 | 373.0 | 194.4 | 319.5 | 458.5 | 523.9 | 220.4 | 321.3 | 217.5 | 168.4 | 552.5 |
| Sample 2  | 254.7            | 293.5 | 288.8 | 93.0  | 511.5 | 261.1 | 179.5 | 250.5 | 446.4 | 115.3 | 209.7 | 282.1 | 159.7 | 159.4 | 126.9 | 214.7 | 515.7 | 130.7 | 113.0 | 153.3 | 104.0 | 127.6 | 144.2 |
| Sample 3  | 252.6            | 289.8 | 284.1 | 95.6  | 502.7 | 267.8 | 180.2 | 253.6 | 444.5 | 115.5 | 199.7 | 259.5 | 150.3 | 169.7 | 117.2 | 210.8 | 206.4 | 92.8  | 77.8  | 143.7 | 111.3 | 229.4 | 156.0 |
| Sample 4  | 124.6            | 260.7 | 73.9  | 136.6 | 441.5 | 144.5 | 195.6 | 103.8 | 442.2 | 124.8 | 88.0  | 194.4 | 134.4 | 58.0  | 96.9  | 98.0  | 144.2 | 42.7  | 88.8  | 91.8  | 83.2  | 302.7 | 368.6 |
| Sample 5  | 118.9            | 221.9 | 74.5  | 136.7 | 402.8 | 142.2 | 194.4 | 99.4  | 440.7 | 93.6  | 83.4  | 145.6 | 93.3  | 95.4  | 88.9  | 98.9  | 133.3 | 59.7  | 104.1 | 78.3  | 83.0  | 299.9 | 379.5 |
| Sample 6  | 57.3             | 100.2 | 113.5 | 136.8 | 355.0 | 62.8  | 194.4 | 58.2  | 440.8 | 111.2 | 56.8  | 145.3 | 91.0  | 76.1  | 50.3  | 77.0  | 117.2 | 89.9  | 40.5  | 98.5  | 41.7  | 312.2 | 410.9 |
| Sample 7  | 129.8            | 223.3 | 71.2  | 136.9 | 379.6 | 100.3 | 194.4 | 78.3  | 440.7 | 116.1 | 75.2  | 158.5 | 127.6 | 73.9  | 53.5  | 81.9  | 118.7 | 60.9  | 43.8  | 95.4  | 51.9  | 312.0 | 393.0 |
| Sample 8  | 129.5            | 167.0 | 62.3  | 129.7 | 501.6 | 107.4 | 195.3 | 95.6  | 441.8 | 113.1 | 83.1  | 175.8 | 131.1 | 111.5 | 61.0  | 100.7 | 204.3 | 46.5  | 67.8  | 70.4  | 75.6  | 271.4 | 336.7 |
| Sample 9  | 122.4            | 216.1 | 76.8  | 144.9 | 204.0 | 156.6 | 197.2 | 119.4 | 440.8 | 136.6 | 101.9 | 163.4 | 165.3 | 106.3 | 57.4  | 127.1 | 88.7  | 89.9  | 66.5  | 122.8 | 87.0  | 315.7 | 416.0 |
| Sample 10 | 111.4            | 217.6 | 68.9  | 131.8 | 529.5 | 122.7 | 194.9 | 96.7  | 444.9 | 112.9 | 86.5  | 178.7 | 133.8 | 113.7 | 54.1  | 75.6  | 214.6 | 76.9  | 76.1  | 100.4 | 95.4  | 233.7 | 306.2 |
| Sample 11 | 227.8            | 200.0 | 250.0 | 137.7 | 421.5 | 214.4 | 193.4 | 177.3 | 448.3 | 108.6 | 127.0 | 170.4 | 68.6  | 143.6 | 71.5  | 180.6 | 128.1 | 94.0  | 61.7  | 138.6 | 83.6  | 271.0 | 555.0 |
| Sample 12 | 253.6            | 264.5 | 159.1 | 121.5 | 491.8 | 180.6 | 192.0 | 196.9 | 444.9 | 98.2  | 151.9 | 197.9 | 104.6 | 144.0 | 54.0  | 214.3 | 234.9 | 68.7  | 104.8 | 143.0 | 124.8 | 213.8 | 126.4 |
| Sample 13 | 68.2             | 204.2 | 120.0 | 136.8 | 376.1 | 152.7 | 194.4 | 123.4 | 440.7 | 83.3  | 91.6  | 154.9 | 92.3  | 107.8 | 75.3  | 106.4 | 89.8  | 71.2  | 62.8  | 105.7 | 101.4 | 302.0 | 388.3 |
| Sample 14 | 67.6             | 208.7 | 125.6 | 136.8 | 355.3 | 154.0 | 194.4 | 125.8 | 440.8 | 69.1  | 104.9 | 109.8 | 119.8 | 82.7  | 45.2  | 94.6  | 118.8 | 89.0  | 46.8  | 105.6 | 75.6  | 312.2 | 410.6 |
| Sample 15 | 130.7            | 157.7 | 122.0 | 136.8 | 385.2 | 132.6 | 194.4 | 114.4 | 440.7 | 104.4 | 91.8  | 152.3 | 57.4  | 57.0  | 73.7  | 71.4  | 117.7 | 68.0  | 58.3  | 102.0 | 64.6  | 312.2 | 396.7 |
| Sample 16 | 283.7            | 320.3 | 306.1 | 138.1 | 513.1 | 289.3 | 206.1 | 260.4 | 447.1 | 120.6 | 197.8 | 290.6 | 177.7 | 181.3 | 121.4 | 228.0 | 250.2 | 140.4 | 136.0 | 164.2 | 108.7 | 164.5 | 188.5 |
| Sample 17 | 271.9            | 313.7 | 318.8 | 133.2 | 504.7 | 266.3 | 171.2 | 262.7 | 450.0 | 132.0 | 206.2 | 300.1 | 167.7 | 183.8 | 122.2 | 223.9 | 305.6 | 62.4  | 106.4 | 162.0 | 110.5 | 201.3 | 208.3 |
| Sample 18 | 417.7            | 307.6 | 228.9 | 335.0 | 484.7 | 279.8 | 221.1 | 343.8 | 419.0 | 129.3 | 284.5 | 464.3 | 517.8 | 356.9 | 136.0 | 220.5 | 346.2 | 248.1 | 178.8 | 224.2 | 189.7 | 312.8 | 401.6 |

## 19. Emission intensities of each boronate assembly (Response variables for PCR)

**Table S7.** Emission intensities of each boronate assembly (Response variables for PCR).

| Sample | RTP intensity |
|--------|---------------|
| 1      | 778.549       |
| 2      | 645.454       |
| 3      | 345.5         |
| 4      | 66.1899       |
| 5      | 63.5087       |
| 6      | 69.2849       |
| 7      | 46.599        |
| 8      | 177.137       |
| 9      | 185.008       |
| 10     | 103.851       |
| 11     | 88.1631       |
| 12     | 524.421       |
| 13     | 209.637       |
| 14     | 226.36        |
| 15     | 67.1545       |
| 16     | 510.855       |
| 17     | 549.608       |
| 18     | 686.65        |

## 20. Score of PCA

**Table S8.** Scores of PCA.

|           | Principal components |          |          |          |          |          |          |
|-----------|----------------------|----------|----------|----------|----------|----------|----------|
|           | 1                    | 2        | 3        | 4        | 5        | 6        | 7        |
| Sample 1  | 12.18452             | 3.368828 | 3.59851  | -2.77796 | -3.83315 | 1.920927 | -0.90575 |
| Sample 2  | 4.257979             | 0.015525 | -3.92248 | -1.02096 | -0.12823 | -0.44193 | 0.359647 |
| Sample 3  | 1.98378              | 0.799355 | -2.77373 | -1.71222 | 0.562065 | -0.9176  | 1.333937 |
| Sample 4  | -4.72272             | 6.095075 | -0.60158 | 2.049507 | -0.87697 | 0.574159 | 0.639347 |
| Sample 5  | -6.33831             | 8.564614 | -0.09264 | 0.878756 | 1.958432 | 1.949653 | -2.13866 |
| Sample 6  | -4.0866              | -5.82786 | 1.694921 | 0.261462 | -0.96085 | 1.899626 | -3.60517 |
| Sample 7  | -4.41213             | -0.87214 | 1.014107 | 1.316993 | -2.33629 | -0.91346 | 0.730651 |
| Sample 8  | -1.09084             | -2.24622 | -0.51289 | 4.029987 | -1.612   | -0.55603 | 0.458691 |
| Sample 9  | -3.17446             | 0.678557 | 1.595929 | -0.8451  | -1.19592 | -3.08519 | 1.012321 |
| Sample 10 | -1.65654             | -1.34245 | 0.031287 | 2.930034 | -2.88854 | -0.88545 | 0.326216 |
| Sample 11 | -1.60369             | 0.471105 | 1.132638 | -4.40172 | 0.775464 | -2.77766 | -0.75223 |
| Sample 12 | 1.725863             | -3.70298 | -3.75516 | -0.1046  | 1.17251  | 1.865837 | -1.86207 |
| Sample 13 | -3.28561             | -1.52004 | 1.056849 | -2.27084 | 1.521342 | 0.300322 | 0.391752 |
| Sample 14 | -3.69195             | -2.61862 | 2.564476 | -1.51336 | 1.271322 | 4.132063 | 4.107137 |
| Sample 15 | -3.55244             | -1.56039 | 1.074276 | -1.80785 | 1.505371 | -2.03311 | -1.06743 |
| Sample 16 | 4.221012             | 0.190021 | -2.722   | -0.24114 | 0.513262 | -0.12233 | 0.327008 |
| Sample 17 | 3.751314             | -0.17404 | -3.75857 | 0.813913 | 0.222588 | 0.395956 | 0.655898 |
| Sample 18 | 9.490813             | -0.31833 | 4.376058 | 4.4151   | 4.329607 | -1.30578 | -0.0113  |

## 21. Loadings of PCA

**Table S9.** Loadings of PCA.

|                            | Principal components |          |          |          |          |          |          |
|----------------------------|----------------------|----------|----------|----------|----------|----------|----------|
|                            | 1                    | 2        | 3        | 4        | 5        | 6        | 7        |
| d of peak 1                | 0.079215             | 0.070519 | -0.10165 | 0.131398 | -0.10419 | -0.2841  | -0.17784 |
| d of peak 2                | 0.162613             | -0.08012 | -0.06159 | -0.09086 | 0.094534 | -0.0742  | 0.017014 |
| d of peak 3                | -0.03581             | 0.064839 | 0.015419 | 0.217189 | -0.29511 | -0.14445 | 0.067399 |
| d of peak 4                | -0.06984             | 0.04242  | -0.11078 | -0.24393 | -0.10768 | -0.04462 | 0.007197 |
| d of peak 5                | 0.131035             | -0.08369 | -0.07235 | 0.17973  | -0.05419 | 0.088416 | -0.08769 |
| d of peak 6                | 0.053496             | -0.17198 | -0.06582 | 0.172985 | -0.06447 | 0.237833 | -0.20495 |
| d of peak 7                | -0.13647             | 0.046583 | -0.00298 | -0.1888  | 0.013111 | -0.03975 | 0.084173 |
| d of peak 8                | 0.07049              | -0.11736 | -0.15348 | 0.191809 | 0.018922 | 0.250161 | 0.000661 |
| d of peak 9                | -0.12863             | -0.15034 | -0.10896 | 0.100398 | 0.157284 | 0.032487 | 0.023468 |
| d of peak 10               | 0.138561             | 0.077776 | -0.01493 | -0.13609 | -0.11852 | -0.04078 | 0.186398 |
| d of peak 11               | -0.00501             | -0.09077 | 0.009588 | 0.016386 | 0.082023 | 0.391561 | 0.336488 |
| d of peak 12               | 0.077051             | -0.2153  | -0.00607 | -0.01468 | -0.06268 | 0.047192 | 0.268825 |
| d of peak 13               | 0.11652              | -0.19074 | 0.035555 | -0.01641 | 0.018116 | -0.17912 | 0.148554 |
| d of peak 14               | 0.134894             | -0.18943 | 0.057749 | 0.022904 | 0.09196  | -0.09785 | 0.031883 |
| d of peak 15               | 0.08391              | -0.24402 | 0.046782 | -0.01885 | -0.05474 | -0.12056 | 0.062469 |
| d of peak 16               | 0.079179             | -0.22646 | 0.004926 | -0.0574  | -0.09648 | -0.16597 | 0.151463 |
| d of peak 17               | 0.144381             | -0.07975 | -0.05187 | 0.182653 | -0.0358  | 0.113021 | -0.11634 |
| d of peak 18               | 0.125058             | -0.1696  | -0.06426 | 0.100661 | -0.08768 | -0.02905 | -0.03582 |
| d of peak 19               | 0.057134             | -0.24217 | 0.014721 | -0.00839 | -0.10537 | -0.12216 | 0.100581 |
| d of peak 20               | 0.108165             | -0.20984 | -0.01928 | -0.10855 | -0.00489 | -0.13049 | 0.087909 |
| d of peak 21               | 0.129306             | -0.05356 | -0.22082 | 0.10388  | 0.045541 | 0.090648 | -0.01548 |
| d of peak 22               | -0.04942             | -0.03587 | -0.2527  | -0.15681 | -0.03761 | 0.170162 | -0.07649 |
| d of peak 23               | 0.115193             | -0.0201  | -0.14903 | 0.157472 | -0.02598 | 0.030396 | 0.125391 |
| relative height of peak 1  | -0.0718              | -0.10111 | 0.124981 | -0.00471 | -0.01673 | 0.189925 | -0.2335  |
| relative height of peak 2  | -0.05939             | -0.18343 | -0.03269 | 0.004598 | 0.06537  | 0.195379 | -0.20899 |
| relative height of peak 3  | -0.06652             | 0.053832 | -0.05547 | 0.179867 | -0.07866 | -0.09511 | 0.269121 |
| relative height of peak 4  | 0.144831             | 0.022434 | 0.120601 | 0.116347 | 0.200034 | -0.07096 | 0.016642 |
| relative height of peak 5  | 0.085002             | -0.02121 | 0.178669 | 0.260508 | 0.149838 | -0.13874 | 0.029024 |
| relative height of peak 7  | 0.178429             | 0.062156 | -0.01325 | -0.05024 | -0.04052 | 0.033973 | 0.030348 |
| relative height of peak 8  | 0.146781             | -0.07359 | 0.133741 | 7.51E-05 | 0.03218  | 0.098001 | -0.12361 |
| relative height of peak 9  | 0.15008              | 0.060237 | 0.218946 | 0.00636  | -0.05239 | 0.065426 | -0.07316 |
| relative height of peak 10 | -0.05307             | -0.15564 | 0.091442 | -0.14012 | 0.279688 | 0.010673 | -0.14691 |
| relative height of peak 11 | -0.01399             | -0.08155 | -0.13886 | 0.102212 | 0.235043 | -0.2833  | -0.2556  |
| relative height of peak 12 | 0.041768             | -0.01986 | 0.214915 | 0.021564 | 0.173131 | 0.255228 | 0.294766 |
| relative height of peak 13 | 0.007097             | 0.054288 | 0.023966 | -0.23339 | 0.366414 | -0.01218 | -0.02182 |
| relative height of peak 14 | 0.000281             | 0.164866 | -0.06239 | -0.12521 | 0.221355 | -0.07878 | -0.09607 |
| relative height of peak 15 | -0.05066             | -0.2351  | 0.11559  | -0.08953 | -0.12834 | 0.045977 | -0.1717  |
| relative height of peak 16 | 0.105784             | -0.17938 | 0.045227 | -0.09449 | 0.111884 | -0.03744 | -0.13823 |
| relative height of peak 17 | 0.089293             | 0.011171 | -0.07721 | -0.27311 | -0.07163 | -0.05968 | -0.04296 |
| relative height of peak 18 | -0.06123             | 0.197333 | -0.03643 | 0.196885 | -0.05608 | 0.117181 | -0.09533 |

|                             |          |          |          |          |          |          |          |
|-----------------------------|----------|----------|----------|----------|----------|----------|----------|
| relative height of peak 19  | 0.019525 | -0.25872 | 0.004004 | -0.07477 | -0.11056 | -0.03307 | -0.15104 |
| relative height of peak 20  | 0.041801 | 0.191375 | -0.1265  | 0.10294  | 0.154563 | 0.01526  | -0.12968 |
| relative height of peak 21  | 0.06896  | -0.26379 | 0.035588 | -0.03422 | -0.0129  | -0.02126 | -0.01305 |
| relative height of peak 22  | 0.167691 | -0.00912 | -0.13309 | 0.018197 | 0.131709 | 0.042098 | -0.03004 |
| relative height of peak 23  | 0.117098 | -0.00967 | -0.25693 | -0.15551 | -0.00839 | 0.052477 | -0.05649 |
| Crystallite size of peak 1  | 0.184549 | 0.058561 | -0.0012  | -0.02053 | 0.036106 | -0.04339 | -0.05139 |
| Crystallite size of peak 2  | 0.145535 | 0.1204   | -0.12631 | 0.007723 | 0.0391   | 0.018433 | 0.17302  |
| Crystallite size of peak 3  | 0.154666 | 0.01302  | -0.11455 | -0.1642  | 0.067532 | -0.01228 | 0.024071 |
| Crystallite size of peak 4  | 0.127864 | 0.045965 | 0.270249 | 0.078831 | 0.047595 | 0.019283 | -0.0684  |
| Crystallite size of peak 5  | 0.133664 | 0.032644 | -0.13647 | 0.078201 | -0.078   | 0.091015 | -0.04741 |
| Crystallite size of peak 6  | 0.170938 | 0.082353 | -0.05916 | -0.11503 | 0.067019 | -0.02093 | 0.093848 |
| Crystallite size of peak 7  | 0.115732 | 0.070529 | 0.217112 | -0.06675 | -0.18274 | 0.110437 | -0.0984  |
| Crystallite size of peak 8  | 0.186889 | 0.050442 | -0.01014 | -0.0696  | 0.05966  | 0.009394 | 0.033092 |
| Crystallite size of peak 9  | 0.105322 | 0.074044 | 0.086893 | -0.161   | -0.28775 | 0.142969 | -0.0806  |
| Crystallite size of peak 10 | 0.10685  | 0.070717 | -0.00234 | 0.093629 | -0.2044  | -0.24507 | -0.0932  |
| Crystallite size of peak 11 | 0.188473 | 0.053306 | 0.011666 | -0.0521  | 0.026944 | 0.0232   | 0.028484 |
| Crystallite size of peak 12 | 0.176987 | 0.042951 | 0.003626 | 0.098847 | 0.100948 | -0.07093 | -0.00376 |
| Crystallite size of peak 13 | 0.135805 | 0.023357 | 0.135708 | 0.194575 | 0.15112  | -0.06426 | 0.078257 |
| Crystallite size of peak 14 | 0.184017 | 0.039845 | 0.093752 | 0.010047 | 0.036435 | 0.001608 | -0.03077 |
| Crystallite size of peak 15 | 0.161572 | 0.135717 | -0.00697 | -0.04663 | -0.00874 | 0.01887  | -0.02225 |
| Crystallite size of peak 16 | 0.176449 | 0.045173 | -0.08058 | -0.10929 | 0.016172 | 0.018448 | -0.01799 |
| Crystallite size of peak 17 | 0.167053 | 0.029832 | -0.08956 | 0.030154 | -0.05898 | 0.047048 | -0.01554 |
| Crystallite size of peak 18 | 0.154691 | 0.054594 | 0.173956 | -0.08444 | -0.12046 | 0.083814 | -0.06674 |
| Crystallite size of peak 19 | 0.170631 | 0.114629 | 0.03808  | 0.036209 | 0.013324 | 0.069271 | -0.08656 |
| Crystallite size of peak 20 | 0.17965  | 0.038076 | 0.086172 | -0.09556 | -0.03832 | 0.031528 | -0.03536 |
| Crystallite size of peak 21 | 0.174668 | 0.070243 | 0.07468  | -0.00224 | 0.036116 | 0.04391  | -0.00129 |
| Crystallite size of peak 22 | -0.12767 | -0.01413 | 0.240681 | 0.079987 | 0.133723 | -0.04619 | 0.007856 |
| Crystallite size of peak 23 | -0.02751 | 0.050836 | 0.348036 | -0.09176 | -0.08253 | -0.03713 | -0.06509 |

## 22. Contribution ratios of each principal component

**Table S10.** Contribution ratios of each principal component.

|                                      | Principal components |          |          |          |          |          |          |
|--------------------------------------|----------------------|----------|----------|----------|----------|----------|----------|
|                                      | 1                    | 2        | 3        | 4        | 5        | 6        | 7        |
| <b>contribution ratio</b>            | 0.387323             | 0.164557 | 0.093451 | 0.081593 | 0.056761 | 0.050419 | 0.039201 |
| <b>cumulative contribution ratio</b> | 0.387323             | 0.55188  | 0.645331 | 0.726924 | 0.783685 | 0.834103 | 0.873304 |

## 23. Standardized correlation coefficients of PCR

**Table S11.** Standardized correlation coefficients of PCR.

|                                             | Principal components |          |          |          |         |          |          |
|---------------------------------------------|----------------------|----------|----------|----------|---------|----------|----------|
|                                             | 1                    | 2        | 3        | 4        | 5       | 6        | 7        |
| <b>Standardized correlation coefficient</b> | 45.78293             | -0.70222 | -16.7413 | -3.26284 | 14.6271 | 21.21973 | 8.785027 |

**24. Contributions of each parameter (Inner product of the PCA loading vector and the standardized correlation coefficients of PCR)**

**Table S12.** Contributions of each parameter (Inner product of the PCA loading vector and the standardized correlation coefficients of PCR).

| <b>Parameter</b>           | <b>Coefficient</b> |
|----------------------------|--------------------|
| d of peak 1                | -4.26461           |
| d of peak 2                | 8.78648            |
| d of peak 3                | -9.44143           |
| d of peak 4                | -3.03533           |
| d of peak 5                | 6.995886           |
| d of peak 6                | 5.410771           |
| d of peak 7                | -5.52699           |
| d of peak 8                | 10.84421           |
| d of peak 9                | -1.09097           |
| d of peak 10               | 6.021619           |
| d of peak 11               | 12.08511           |
| d of peak 12               | 6.274529           |
| d of peak 13               | 2.696136           |
| d of peak 14               | 4.816274           |
| d of peak 15               | 0.481053           |
| d of peak 16               | 0.286449           |
| d of peak 17               | 7.791154           |
| d of peak 18               | 4.378386           |
| d of peak 19               | -0.68325           |
| d of peak 20               | 3.708173           |
| d of peak 21               | 11.76923           |
| d of peak 22               | 4.893609           |
| d of peak 23               | 8.635727           |
| relative height of peak 1  | -3.55917           |
| relative height of peak 2  | 1.207961           |
| relative height of peak 3  | -3.54614           |
| relative height of peak 4  | 5.782739           |
| relative height of peak 5  | -0.43199           |
| relative height of peak 7  | 8.906027           |
| relative height of peak 8  | 5.996817           |
| relative height of peak 9  | 3.121944           |
| relative height of peak 10 | -0.36707           |
| relative height of peak 11 | -3.41091           |
| relative height of peak 12 | 8.795701           |
| relative height of peak 13 | 5.556609           |
| relative height of peak 14 | 2.072307           |
| relative height of peak 15 | -6.20723           |
| relative height of peak 16 | 4.14794            |
| relative height of peak 17 | 3.57248            |



|                             |          |
|-----------------------------|----------|
| relative height of peak 18  | -2.14566 |
| relative height of peak 19  | -2.39331 |
| relative height of peak 20  | 5.006638 |
| relative height of peak 21  | 2.103865 |
| relative height of peak 22  | 12.40841 |
| relative height of peak 23  | 10.6712  |
| Crystallite size of peak 1  | 7.651115 |
| Crystallite size of peak 2  | 11.15097 |
| Crystallite size of peak 3  | 10.46412 |
| Crystallite size of peak 4  | 1.544663 |
| Crystallite size of peak 5  | 8.500027 |
| Crystallite size of peak 6  | 10.49451 |
| Crystallite size of peak 7  | 0.63808  |
| Crystallite size of peak 8  | 10.2805  |
| Crystallite size of peak 9  | 1.95732  |
| Crystallite size of peak 10 | -4.43308 |
| Crystallite size of peak 11 | 9.702755 |
| Crystallite size of peak 12 | 7.627998 |
| Crystallite size of peak 13 | 4.828744 |
| Crystallite size of peak 14 | 7.091348 |
| Crystallite size of peak 15 | 7.647912 |
| Crystallite size of peak 16 | 10.22218 |
| Crystallite size of peak 17 | 9.027336 |
| Crystallite size of peak 18 | 3.837264 |
| Crystallite size of peak 19 | 7.880221 |
| Crystallite size of peak 20 | 6.865245 |
| Crystallite size of peak 21 | 8.153282 |
| Crystallite size of peak 22 | -9.08058 |
| Crystallite size of peak 23 | -9.38925 |

## 25. Cartesian coordinates of the dimer models

Table S13  $d$  of peak 2 = 5.25 Å.

|   | x       | y      | z      |
|---|---------|--------|--------|
| O | 2.1687  | 0.2578 | 9.6421 |
| B | 2.7459  | 1.4574 | 9.3528 |
| C | 1.9625  | 2.4337 | 8.4111 |
| C | 0.6761  | 2.0861 | 7.9842 |
| H | 0.261   | 1.1252 | 8.2988 |
| C | -0.083  | 2.935  | 7.1903 |
| H | -1.0924 | 2.6454 | 6.8869 |
| C | 0.4409  | 4.1557 | 6.789  |
| H | -0.1541 | 4.837  | 6.1754 |
| C | 1.7254  | 4.5216 | 7.187  |
| H | 2.1359  | 5.4864 | 6.8769 |
| C | 2.4761  | 3.6745 | 8.0031 |
| H | 3.4781  | 3.972  | 8.325  |

---

|   |         |         |         |
|---|---------|---------|---------|
| O | 3.9381  | 1.8655  | 9.8803  |
| C | 4.6641  | 1.0016  | 10.7716 |
| H | 5.4342  | 0.4646  | 10.1898 |
| H | 5.1835  | 1.6444  | 11.5002 |
| C | 3.7562  | -0.0002 | 11.4858 |
| C | 2.8878  | 0.6998  | 12.5334 |
| H | 2.137   | 1.3602  | 12.0789 |
| O | 2.1686  | -0.2582 | 13.3317 |
| B | 2.7458  | -1.4578 | 13.6211 |
| O | 3.9381  | -1.8659 | 13.0936 |
| C | 1.9624  | -2.4341 | 14.5627 |
| C | 0.676   | -2.0866 | 14.9895 |
| H | 0.2563  | -1.1337 | 14.6625 |
| C | -0.0831 | -2.9355 | 15.7833 |
| C | 0.4408  | -4.1562 | 16.1846 |
| H | -0.149  | -4.8296 | 16.8129 |
| C | 1.7253  | -4.522  | 15.7867 |
| H | 2.1408  | -5.4831 | 16.1027 |
| H | -1.0924 | -2.643  | 16.087  |
| C | 2.476   | -3.6749 | 14.9706 |
| H | 3.4766  | -3.9743 | 14.647  |
| H | 3.5179  | 1.3182  | 13.1963 |
| C | 4.6641  | -1.0019 | 12.2023 |
| H | 5.1858  | -1.6447 | 11.4749 |
| H | 5.4332  | -0.4614 | 12.7828 |
| C | 2.8879  | -0.7002 | 10.4404 |
| H | 3.5167  | -1.3197 | 9.7773  |
| H | 2.1411  | -1.3555 | 10.9096 |
| O | -0.9514 | 5.5741  | 9.6272  |
| B | -0.3742 | 6.7738  | 9.3379  |
| C | -1.1576 | 7.7501  | 8.3962  |
| C | -2.444  | 7.4025  | 7.9693  |
| H | -2.8567 | 6.4395  | 8.2814  |
| C | -3.2031 | 8.2513  | 7.1754  |
| H | -4.2099 | 7.9573  | 6.8655  |
| C | -2.6793 | 9.472   | 6.7741  |
| H | -3.2687 | 10.145  | 6.1449  |
| C | -1.3947 | 9.838   | 7.1721  |
| H | -0.9791 | 10.7989 | 6.8555  |
| C | -0.6441 | 8.9907  | 7.9883  |
| H | 0.3564  | 9.2893  | 8.3131  |
| O | 0.818   | 7.1819  | 9.8655  |
| C | 1.544   | 6.318   | 10.7567 |
| H | 2.307   | 5.7744  | 10.1722 |
| H | 2.066   | 6.9605  | 11.4841 |
| C | 0.6361  | 5.3161  | 11.4709 |
| C | -0.2323 | 6.0162  | 12.5185 |

---

|   |         |         |         |
|---|---------|---------|---------|
| H | -0.9784 | 6.6723  | 12.0491 |
| O | -0.9515 | 5.0581  | 13.3168 |
| B | -0.3743 | 3.8584  | 13.6062 |
| O | 0.818   | 3.4504  | 13.0787 |
| C | -1.1577 | 2.8821  | 14.5478 |
| C | -2.4441 | 3.2297  | 14.9747 |
| H | -2.8584 | 4.1924  | 14.6638 |
| C | -3.2032 | 2.3808  | 15.7684 |
| C | -2.6794 | 1.1602  | 16.1698 |
| H | -3.2675 | 0.4887  | 16.8019 |
| C | -1.3948 | 0.7942  | 15.7719 |
| H | -0.9739 | -0.1576 | 16.1021 |
| H | -4.2098 | 2.6754  | 16.0784 |
| C | -0.6442 | 1.6415  | 14.9557 |
| H | 0.3528  | 1.3329  | 14.6292 |
| H | 0.3973  | 6.6356  | 13.1814 |
| C | 1.544   | 4.3143  | 12.1874 |
| H | 2.0671  | 3.6747  | 11.4583 |
| H | 2.3122  | 4.8541  | 12.7699 |
| C | -0.2322 | 4.6161  | 10.4255 |
| H | 0.394   | 4.0017  | 9.7638  |
| H | -0.9794 | 3.9612  | 10.8952 |

**Table S14**  $d$  of peak 2 = 5.27 Å.

|   | x       | y       | z       |
|---|---------|---------|---------|
| O | 2.1687  | 0.2578  | 9.6421  |
| B | 2.7459  | 1.4574  | 9.3528  |
| C | 1.9625  | 2.4337  | 8.4111  |
| C | 0.6761  | 2.0861  | 7.9842  |
| H | 0.261   | 1.1252  | 8.2988  |
| C | -0.083  | 2.935   | 7.1903  |
| H | -1.0924 | 2.6454  | 6.8869  |
| C | 0.4409  | 4.1557  | 6.789   |
| H | -0.1541 | 4.837   | 6.1754  |
| C | 1.7254  | 4.5216  | 7.187   |
| H | 2.1359  | 5.4864  | 6.8769  |
| C | 2.4761  | 3.6745  | 8.0031  |
| H | 3.4781  | 3.972   | 8.325   |
| O | 3.9381  | 1.8655  | 9.8803  |
| C | 4.6641  | 1.0016  | 10.7716 |
| H | 5.4342  | 0.4646  | 10.1898 |
| H | 5.1835  | 1.6444  | 11.5002 |
| C | 3.7562  | -0.0002 | 11.4858 |
| C | 2.8878  | 0.6998  | 12.5334 |
| H | 2.137   | 1.3602  | 12.0789 |
| O | 2.1686  | -0.2582 | 13.3317 |
| B | 2.7458  | -1.4578 | 13.6211 |

---

|   |         |         |         |
|---|---------|---------|---------|
| O | 3.9381  | -1.8659 | 13.0936 |
| C | 1.9624  | -2.4341 | 14.5627 |
| C | 0.676   | -2.0866 | 14.9895 |
| H | 0.2563  | -1.1337 | 14.6625 |
| C | -0.0831 | -2.9355 | 15.7833 |
| C | 0.4408  | -4.1562 | 16.1846 |
| H | -0.149  | -4.8296 | 16.8129 |
| C | 1.7253  | -4.522  | 15.7867 |
| H | 2.1408  | -5.4831 | 16.1027 |
| H | -1.0924 | -2.643  | 16.087  |
| C | 2.476   | -3.6749 | 14.9706 |
| H | 3.4766  | -3.9743 | 14.647  |
| H | 3.5179  | 1.3182  | 13.1963 |
| C | 4.6641  | -1.0019 | 12.2023 |
| H | 5.1858  | -1.6447 | 11.4749 |
| H | 5.4332  | -0.4614 | 12.7828 |
| C | 2.8879  | -0.7002 | 10.4404 |
| H | 3.5167  | -1.3197 | 9.7773  |
| H | 2.1411  | -1.3555 | 10.9096 |
| O | -0.9514 | 5.5938  | 9.6303  |
| B | -0.3742 | 6.7935  | 9.341   |
| C | -1.1576 | 7.7698  | 8.3993  |
| C | -2.444  | 7.4222  | 7.9724  |
| H | -2.8567 | 6.4592  | 8.2845  |
| C | -3.2031 | 8.271   | 7.1785  |
| H | -4.2099 | 7.977   | 6.8686  |
| C | -2.6793 | 9.4917  | 6.7772  |
| H | -3.2687 | 10.1647 | 6.148   |
| C | -1.3947 | 9.8577  | 7.1752  |
| H | -0.9791 | 10.8186 | 6.8586  |
| C | -0.6441 | 9.0104  | 7.9914  |
| H | 0.3564  | 9.309   | 8.3162  |
| O | 0.818   | 7.2016  | 9.8686  |
| C | 1.544   | 6.3377  | 10.7598 |
| H | 2.307   | 5.7941  | 10.1753 |
| H | 2.066   | 6.9802  | 11.4872 |
| C | 0.6361  | 5.3358  | 11.474  |
| C | -0.2323 | 6.0359  | 12.5216 |
| H | -0.9784 | 6.692   | 12.0522 |
| O | -0.9515 | 5.0778  | 13.3199 |
| B | -0.3743 | 3.8781  | 13.6093 |
| O | 0.818   | 3.4701  | 13.0818 |
| C | -1.1577 | 2.9018  | 14.5509 |
| C | -2.4441 | 3.2494  | 14.9778 |
| H | -2.8584 | 4.2121  | 14.6669 |
| C | -3.2032 | 2.4005  | 15.7715 |
| C | -2.6794 | 1.1799  | 16.1729 |

---

|   |         |         |         |
|---|---------|---------|---------|
| H | -3.2675 | 0.5084  | 16.805  |
| C | -1.3948 | 0.8139  | 15.775  |
| H | -0.9739 | -0.1379 | 16.1052 |
| H | -4.2098 | 2.6951  | 16.0815 |
| C | -0.6442 | 1.6612  | 14.9588 |
| H | 0.3528  | 1.3526  | 14.6323 |
| H | 0.3973  | 6.6553  | 13.1845 |
| C | 1.544   | 4.334   | 12.1905 |
| H | 2.0671  | 3.6944  | 11.4614 |
| H | 2.3122  | 4.8738  | 12.773  |
| C | -0.2322 | 4.6358  | 10.4286 |
| H | 0.394   | 4.0214  | 9.7669  |
| H | -0.9794 | 3.9809  | 10.8983 |

**Table S15** *d* of peak 2 = 5.29 Å.

|   | x       | y       | z       |
|---|---------|---------|---------|
| O | 2.1687  | 0.2578  | 9.6421  |
| B | 2.7459  | 1.4574  | 9.3528  |
| C | 1.9625  | 2.4337  | 8.4111  |
| C | 0.6761  | 2.0861  | 7.9842  |
| H | 0.261   | 1.1252  | 8.2988  |
| C | -0.083  | 2.935   | 7.1903  |
| H | -1.0924 | 2.6454  | 6.8869  |
| C | 0.4409  | 4.1557  | 6.789   |
| H | -0.1541 | 4.837   | 6.1754  |
| C | 1.7254  | 4.5216  | 7.187   |
| H | 2.1359  | 5.4864  | 6.8769  |
| C | 2.4761  | 3.6745  | 8.0031  |
| H | 3.4781  | 3.972   | 8.325   |
| O | 3.9381  | 1.8655  | 9.8803  |
| C | 4.6641  | 1.0016  | 10.7716 |
| H | 5.4342  | 0.4646  | 10.1898 |
| H | 5.1835  | 1.6444  | 11.5002 |
| C | 3.7562  | -0.0002 | 11.4858 |
| C | 2.8878  | 0.6998  | 12.5334 |
| H | 2.137   | 1.3602  | 12.0789 |
| O | 2.1686  | -0.2582 | 13.3317 |
| B | 2.7458  | -1.4578 | 13.6211 |
| O | 3.9381  | -1.8659 | 13.0936 |
| C | 1.9624  | -2.4341 | 14.5627 |
| C | 0.676   | -2.0866 | 14.9895 |
| H | 0.2563  | -1.1337 | 14.6625 |
| C | -0.0831 | -2.9355 | 15.7833 |
| C | 0.4408  | -4.1562 | 16.1846 |
| H | -0.149  | -4.8296 | 16.8129 |
| C | 1.7253  | -4.522  | 15.7867 |
| H | 2.1408  | -5.4831 | 16.1027 |

---

|   |         |         |         |
|---|---------|---------|---------|
| H | -1.0924 | -2.643  | 16.087  |
| C | 2.476   | -3.6749 | 14.9706 |
| H | 3.4766  | -3.9743 | 14.647  |
| H | 3.5179  | 1.3182  | 13.1963 |
| C | 4.6641  | -1.0019 | 12.2023 |
| H | 5.1858  | -1.6447 | 11.4749 |
| H | 5.4332  | -0.4614 | 12.7828 |
| C | 2.8879  | -0.7002 | 10.4404 |
| H | 3.5167  | -1.3197 | 9.7773  |
| H | 2.1411  | -1.3555 | 10.9096 |
| O | -0.9514 | 5.6136  | 9.6334  |
| B | -0.3742 | 6.8133  | 9.3441  |
| C | -1.1576 | 7.7896  | 8.4024  |
| C | -2.444  | 7.442   | 7.9755  |
| H | -2.8567 | 6.479   | 8.2876  |
| C | -3.2031 | 8.2908  | 7.1816  |
| H | -4.2099 | 7.9968  | 6.8717  |
| C | -2.6793 | 9.5115  | 6.7803  |
| H | -3.2687 | 10.1845 | 6.1511  |
| C | -1.3947 | 9.8775  | 7.1783  |
| H | -0.9791 | 10.8384 | 6.8617  |
| C | -0.6441 | 9.0302  | 7.9945  |
| H | 0.3564  | 9.3288  | 8.3193  |
| O | 0.818   | 7.2214  | 9.8717  |
| C | 1.544   | 6.3575  | 10.7629 |
| H | 2.307   | 5.8139  | 10.1784 |
| H | 2.066   | 7       | 11.4903 |
| C | 0.6361  | 5.3556  | 11.4771 |
| C | -0.2323 | 6.0557  | 12.5247 |
| H | -0.9784 | 6.7118  | 12.0553 |
| O | -0.9515 | 5.0976  | 13.323  |
| B | -0.3743 | 3.8979  | 13.6124 |
| O | 0.818   | 3.4899  | 13.0849 |
| C | -1.1577 | 2.9216  | 14.554  |
| C | -2.4441 | 3.2692  | 14.9809 |
| H | -2.8584 | 4.2319  | 14.67   |
| C | -3.2032 | 2.4203  | 15.7746 |
| C | -2.6794 | 1.1997  | 16.176  |
| H | -3.2675 | 0.5282  | 16.8081 |
| C | -1.3948 | 0.8337  | 15.7781 |
| H | -0.9739 | -0.1181 | 16.1083 |
| H | -4.2098 | 2.7149  | 16.0846 |
| C | -0.6442 | 1.681   | 14.9619 |
| H | 0.3528  | 1.3724  | 14.6354 |
| H | 0.3973  | 6.6751  | 13.1876 |
| C | 1.544   | 4.3538  | 12.1936 |
| H | 2.0671  | 3.7142  | 11.4645 |

---

|   |         |        |         |
|---|---------|--------|---------|
| H | 2.3122  | 4.8936 | 12.7761 |
| C | -0.2322 | 4.6556 | 10.4317 |
| H | 0.394   | 4.0412 | 9.77    |
| H | -0.9794 | 4.0007 | 10.9014 |

**Table S16** *d* of peak 2 = 5.30 Å.

|   | x       | y       | z       |
|---|---------|---------|---------|
| O | 2.1687  | 0.2578  | 9.6421  |
| B | 2.7459  | 1.4574  | 9.3528  |
| C | 1.9625  | 2.4337  | 8.4111  |
| C | 0.6761  | 2.0861  | 7.9842  |
| H | 0.261   | 1.1252  | 8.2988  |
| C | -0.083  | 2.935   | 7.1903  |
| H | -1.0924 | 2.6454  | 6.8869  |
| C | 0.4409  | 4.1557  | 6.789   |
| H | -0.1541 | 4.837   | 6.1754  |
| C | 1.7254  | 4.5216  | 7.187   |
| H | 2.1359  | 5.4864  | 6.8769  |
| C | 2.4761  | 3.6745  | 8.0031  |
| H | 3.4781  | 3.972   | 8.325   |
| O | 3.9381  | 1.8655  | 9.8803  |
| C | 4.6641  | 1.0016  | 10.7716 |
| H | 5.4342  | 0.4646  | 10.1898 |
| H | 5.1835  | 1.6444  | 11.5002 |
| C | 3.7562  | -0.0002 | 11.4858 |
| C | 2.8878  | 0.6998  | 12.5334 |
| H | 2.137   | 1.3602  | 12.0789 |
| O | 2.1686  | -0.2582 | 13.3317 |
| B | 2.7458  | -1.4578 | 13.6211 |
| O | 3.9381  | -1.8659 | 13.0936 |
| C | 1.9624  | -2.4341 | 14.5627 |
| C | 0.676   | -2.0866 | 14.9895 |
| H | 0.2563  | -1.1337 | 14.6625 |
| C | -0.0831 | -2.9355 | 15.7833 |
| C | 0.4408  | -4.1562 | 16.1846 |
| H | -0.149  | -4.8296 | 16.8129 |
| C | 1.7253  | -4.522  | 15.7867 |
| H | 2.1408  | -5.4831 | 16.1027 |
| H | -1.0924 | -2.643  | 16.087  |
| C | 2.476   | -3.6749 | 14.9706 |
| H | 3.4766  | -3.9743 | 14.647  |
| H | 3.5179  | 1.3182  | 13.1963 |
| C | 4.6641  | -1.0019 | 12.2023 |
| H | 5.1858  | -1.6447 | 11.4749 |
| H | 5.4332  | -0.4614 | 12.7828 |
| C | 2.8879  | -0.7002 | 10.4404 |
| H | 3.5167  | -1.3197 | 9.7773  |

|   |         |         |         |
|---|---------|---------|---------|
| H | 2.1411  | -1.3555 | 10.9096 |
| O | -0.9514 | 5.6257  | 9.6353  |
| B | -0.3742 | 6.8254  | 9.346   |
| C | -1.1576 | 7.8017  | 8.4043  |
| C | -2.444  | 7.4541  | 7.9774  |
| H | -2.8567 | 6.4911  | 8.2895  |
| C | -3.2031 | 8.3029  | 7.1835  |
| H | -4.2099 | 8.0089  | 6.8736  |
| C | -2.6793 | 9.5236  | 6.7822  |
| H | -3.2687 | 10.1966 | 6.153   |
| C | -1.3947 | 9.8896  | 7.1802  |
| H | -0.9791 | 10.8505 | 6.8636  |
| C | -0.6441 | 9.0423  | 7.9964  |
| H | 0.3564  | 9.3409  | 8.3212  |
| O | 0.818   | 7.2335  | 9.8736  |
| C | 1.544   | 6.3696  | 10.7648 |
| H | 2.307   | 5.826   | 10.1803 |
| H | 2.066   | 7.0121  | 11.4922 |
| C | 0.6361  | 5.3677  | 11.479  |
| C | -0.2323 | 6.0678  | 12.5266 |
| H | -0.9784 | 6.7239  | 12.0572 |
| O | -0.9515 | 5.1097  | 13.3249 |
| B | -0.3743 | 3.91    | 13.6143 |
| O | 0.818   | 3.502   | 13.0868 |
| C | -1.1577 | 2.9337  | 14.5559 |
| C | -2.4441 | 3.2813  | 14.9828 |
| H | -2.8584 | 4.244   | 14.6719 |
| C | -3.2032 | 2.4324  | 15.7765 |
| C | -2.6794 | 1.2118  | 16.1779 |
| H | -3.2675 | 0.5403  | 16.81   |
| C | -1.3948 | 0.8458  | 15.78   |
| H | -0.9739 | -0.106  | 16.1102 |
| H | -4.2098 | 2.727   | 16.0865 |
| C | -0.6442 | 1.6931  | 14.9638 |
| H | 0.3528  | 1.3845  | 14.6373 |
| H | 0.3973  | 6.6872  | 13.1895 |
| C | 1.544   | 4.3659  | 12.1955 |
| H | 2.0671  | 3.7263  | 11.4664 |
| H | 2.3122  | 4.9057  | 12.778  |
| C | -0.2322 | 4.6677  | 10.4336 |
| H | 0.394   | 4.0533  | 9.7719  |
| H | -0.9794 | 4.0128  | 10.9033 |

**Table S17** *d* of peak 2 = 5.32 Å.

|   | x      | y      | z      |
|---|--------|--------|--------|
| O | 2.1687 | 0.2578 | 9.6421 |
| B | 2.7459 | 1.4574 | 9.3528 |



---

|   |         |         |         |
|---|---------|---------|---------|
| C | 1.9625  | 2.4337  | 8.4111  |
| C | 0.6761  | 2.0861  | 7.9842  |
| H | 0.261   | 1.1252  | 8.2988  |
| C | -0.083  | 2.935   | 7.1903  |
| H | -1.0924 | 2.6454  | 6.8869  |
| C | 0.4409  | 4.1557  | 6.789   |
| H | -0.1541 | 4.837   | 6.1754  |
| C | 1.7254  | 4.5216  | 7.187   |
| H | 2.1359  | 5.4864  | 6.8769  |
| C | 2.4761  | 3.6745  | 8.0031  |
| H | 3.4781  | 3.972   | 8.325   |
| O | 3.9381  | 1.8655  | 9.8803  |
| C | 4.6641  | 1.0016  | 10.7716 |
| H | 5.4342  | 0.4646  | 10.1898 |
| H | 5.1835  | 1.6444  | 11.5002 |
| C | 3.7562  | -0.0002 | 11.4858 |
| C | 2.8878  | 0.6998  | 12.5334 |
| H | 2.137   | 1.3602  | 12.0789 |
| O | 2.1686  | -0.2582 | 13.3317 |
| B | 2.7458  | -1.4578 | 13.6211 |
| O | 3.9381  | -1.8659 | 13.0936 |
| C | 1.9624  | -2.4341 | 14.5627 |
| C | 0.676   | -2.0866 | 14.9895 |
| H | 0.2563  | -1.1337 | 14.6625 |
| C | -0.0831 | -2.9355 | 15.7833 |
| C | 0.4408  | -4.1562 | 16.1846 |
| H | -0.149  | -4.8296 | 16.8129 |
| C | 1.7253  | -4.522  | 15.7867 |
| H | 2.1408  | -5.4831 | 16.1027 |
| H | -1.0924 | -2.643  | 16.087  |
| C | 2.476   | -3.6749 | 14.9706 |
| H | 3.4766  | -3.9743 | 14.647  |
| H | 3.5179  | 1.3182  | 13.1963 |
| C | 4.6641  | -1.0019 | 12.2023 |
| H | 5.1858  | -1.6447 | 11.4749 |
| H | 5.4332  | -0.4614 | 12.7828 |
| C | 2.8879  | -0.7002 | 10.4404 |
| H | 3.5167  | -1.3197 | 9.7773  |
| H | 2.1411  | -1.3555 | 10.9096 |
| O | -0.9514 | 5.6432  | 9.6381  |
| B | -0.3742 | 6.8429  | 9.3488  |
| C | -1.1576 | 7.8192  | 8.4071  |
| C | -2.444  | 7.4716  | 7.9802  |
| H | -2.8567 | 6.5086  | 8.2923  |
| C | -3.2031 | 8.3204  | 7.1863  |
| H | -4.2099 | 8.0264  | 6.8764  |
| C | -2.6793 | 9.5411  | 6.785   |

---

|   |         |         |         |
|---|---------|---------|---------|
| H | -3.2687 | 10.2141 | 6.1558  |
| C | -1.3947 | 9.9071  | 7.183   |
| H | -0.9791 | 10.868  | 6.8664  |
| C | -0.6441 | 9.0598  | 7.9992  |
| H | 0.3564  | 9.3584  | 8.324   |
| O | 0.818   | 7.251   | 9.8764  |
| C | 1.544   | 6.3871  | 10.7676 |
| H | 2.307   | 5.8435  | 10.1831 |
| H | 2.066   | 7.0296  | 11.495  |
| C | 0.6361  | 5.3852  | 11.4818 |
| C | -0.2323 | 6.0853  | 12.5294 |
| H | -0.9784 | 6.7414  | 12.06   |
| O | -0.9515 | 5.1272  | 13.3277 |
| B | -0.3743 | 3.9275  | 13.6171 |
| O | 0.818   | 3.5195  | 13.0896 |
| C | -1.1577 | 2.9512  | 14.5587 |
| C | -2.4441 | 3.2988  | 14.9856 |
| H | -2.8584 | 4.2615  | 14.6747 |
| C | -3.2032 | 2.4499  | 15.7793 |
| C | -2.6794 | 1.2293  | 16.1807 |
| H | -3.2675 | 0.5578  | 16.8128 |
| C | -1.3948 | 0.8633  | 15.7828 |
| H | -0.9739 | -0.0885 | 16.113  |
| H | -4.2098 | 2.7445  | 16.0893 |
| C | -0.6442 | 1.7106  | 14.9666 |
| H | 0.3528  | 1.402   | 14.6401 |
| H | 0.3973  | 6.7047  | 13.1923 |
| C | 1.544   | 4.3834  | 12.1983 |
| H | 2.0671  | 3.7438  | 11.4692 |
| H | 2.3122  | 4.9232  | 12.7808 |
| C | -0.2322 | 4.6852  | 10.4364 |
| H | 0.394   | 4.0708  | 9.7747  |
| H | -0.9794 | 4.0303  | 10.9061 |

**Table S18**  $d$  of peak 2 = 5.34 Å.

|   | x       | y      | z      |
|---|---------|--------|--------|
| O | 2.1687  | 0.2578 | 9.6421 |
| B | 2.7459  | 1.4574 | 9.3528 |
| C | 1.9625  | 2.4337 | 8.4111 |
| C | 2.4761  | 3.6745 | 8.0031 |
| H | 3.4781  | 3.972  | 8.325  |
| C | 1.7254  | 4.5216 | 7.187  |
| H | 2.1359  | 5.4864 | 6.8769 |
| C | 0.4409  | 4.1557 | 6.789  |
| H | -0.1541 | 4.837  | 6.1754 |
| C | -0.083  | 2.935  | 7.1903 |
| H | -1.0924 | 2.6454 | 6.8869 |

---

|   |         |         |         |
|---|---------|---------|---------|
| C | 0.6761  | 2.0861  | 7.9842  |
| H | 0.261   | 1.1252  | 8.2988  |
| O | 3.9381  | 1.8655  | 9.8803  |
| C | 4.6641  | 1.0016  | 10.7716 |
| C | 3.7562  | -0.0002 | 11.4858 |
| C | 2.8878  | 0.6998  | 12.5334 |
| H | 2.137   | 1.3602  | 12.0789 |
| H | 3.5179  | 1.3182  | 13.1963 |
| O | 2.1686  | -0.2582 | 13.3317 |
| B | 2.7458  | -1.4578 | 13.6211 |
| C | 1.9624  | -2.4341 | 14.5627 |
| C | 2.476   | -3.6749 | 14.9706 |
| H | 3.4766  | -3.9743 | 14.647  |
| C | 1.7253  | -4.522  | 15.7867 |
| H | 2.1408  | -5.4831 | 16.1027 |
| C | 0.4408  | -4.1562 | 16.1846 |
| H | -0.149  | -4.8296 | 16.8129 |
| C | -0.0831 | -2.9355 | 15.7833 |
| H | -1.0924 | -2.643  | 16.087  |
| C | 0.676   | -2.0866 | 14.9895 |
| H | 0.2563  | -1.1337 | 14.6625 |
| O | 3.9381  | -1.8659 | 13.0936 |
| C | 4.6641  | -1.0019 | 12.2023 |
| H | 5.4332  | -0.4614 | 12.7828 |
| H | 5.1858  | -1.6447 | 11.4749 |
| H | 5.4342  | 0.4646  | 10.1898 |
| H | 5.1835  | 1.6444  | 11.5002 |
| C | 2.8879  | -0.7002 | 10.4404 |
| H | 2.1411  | -1.3555 | 10.9096 |
| H | 3.5167  | -1.3197 | 9.7773  |
| O | -0.9514 | 5.6618  | 9.641   |
| B | -0.3742 | 6.8615  | 9.3517  |
| C | -1.1576 | 7.8378  | 8.41    |
| C | -0.6441 | 9.0784  | 8.0021  |
| H | 0.3564  | 9.377   | 8.3269  |
| C | -1.3947 | 9.9257  | 7.1859  |
| H | -0.9791 | 10.8866 | 6.8693  |
| C | -2.6793 | 9.5597  | 6.7879  |
| H | -3.2687 | 10.2327 | 6.1587  |
| C | -3.2031 | 8.339   | 7.1892  |
| H | -4.2099 | 8.045   | 6.8793  |
| C | -2.444  | 7.4902  | 7.9831  |
| H | -2.8567 | 6.5272  | 8.2952  |
| O | 0.818   | 7.2696  | 9.8793  |
| C | 1.544   | 6.4057  | 10.7705 |
| C | 0.6361  | 5.4038  | 11.4847 |
| C | -0.2323 | 6.1039  | 12.5323 |

---

---

|   |         |         |         |
|---|---------|---------|---------|
| H | -0.9784 | 6.76    | 12.0629 |
| H | 0.3973  | 6.7233  | 13.1952 |
| O | -0.9515 | 5.1458  | 13.3306 |
| B | -0.3743 | 3.9461  | 13.62   |
| C | -1.1577 | 2.9698  | 14.5616 |
| C | -0.6442 | 1.7292  | 14.9695 |
| H | 0.3528  | 1.4206  | 14.643  |
| C | -1.3948 | 0.8819  | 15.7857 |
| H | -0.9739 | -0.0699 | 16.1159 |
| C | -2.6794 | 1.2479  | 16.1836 |
| H | -3.2675 | 0.5764  | 16.8157 |
| C | -3.2032 | 2.4685  | 15.7822 |
| H | -4.2098 | 2.7631  | 16.0922 |
| C | -2.4441 | 3.3174  | 14.9885 |
| H | -2.8584 | 4.2801  | 14.6776 |
| O | 0.818   | 3.5381  | 13.0925 |
| C | 1.544   | 4.402   | 12.2012 |
| H | 2.3122  | 4.9418  | 12.7837 |
| H | 2.0671  | 3.7624  | 11.4721 |
| H | 2.307   | 5.8621  | 10.186  |
| H | 2.066   | 7.0482  | 11.4979 |
| C | -0.2322 | 4.7038  | 10.4393 |
| H | -0.9794 | 4.0489  | 10.909  |
| H | 0.394   | 4.0894  | 9.7776  |

---
